# Supplementary material
Source: PubMed Central journal article supplement (PMC5096912)
Supplement: jci-126-84645-s001.pdf [file jci-126-84645-s001.pdf]

Figure S1

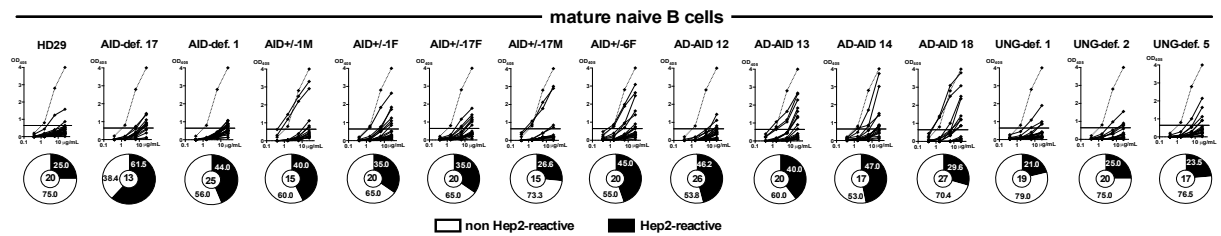

**Supplemental Figure 1. Increased frequencies of autoreactive mature naïve B cells in all subjects with *AICDA* gene mutations.** Recombinant antibodies expressed by mature naïve B cells from AID-deficient patients (n=6), AID<sup>+/-</sup> (n=5), AD-AID (n=4) and UNG-deficient patients (n=3) were tested by ELISA for HEp-2 reactivity. Solid lines show binding for each cloned recombinant antibody. Dotted lines show ED38-positive control. Horizontal lines show cutoff OD<sub>405</sub> for positive reactivity. For each individual, the frequency of autoreactive and non autoreactive B cells are summarized in pie charts, with the number of antibodies tested shown in the center.

Figure S2

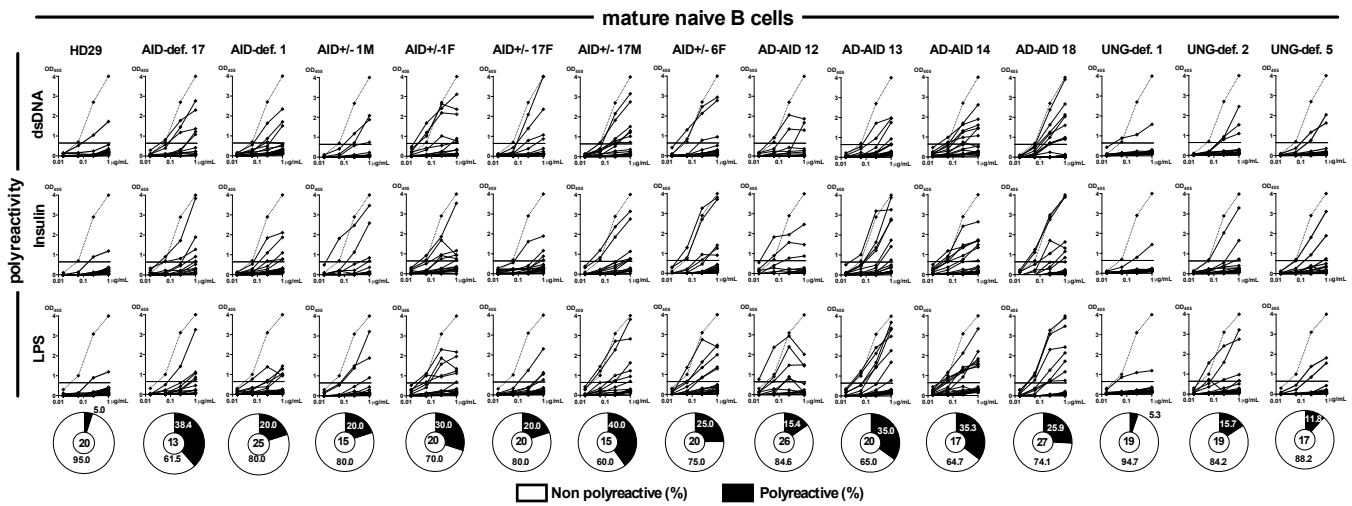

**Supplemental Figure 2. Increased frequencies of polyreactive mature naïve B cells in all subjects with *AICDA* mutations.** Recombinant antibodies expressed by mature naïve B cells from AID-deficient patients (n=6), AID<sup>+/-</sup> (n=5), AD-AID (n=4) and UNG-deficient patients (n=3) were tested by ELISA for reactivity against lipopolysaccharide (LPS), Insulin and double stranded DNA (dsDNA). Antibodies were considered polyreactive if they reacted to all 3 antigens. Solid lines show binding for each cloned recombinant antibody. Dotted lines show ED38-positive control. Horizontal lines show cutoff OD<sub>405</sub> for positive reactivity. For each individual, the frequency of polyreactive and non polyreactive B cells are summarized in pie charts, with the number of antibodies tested shown in the center.

Figure S3

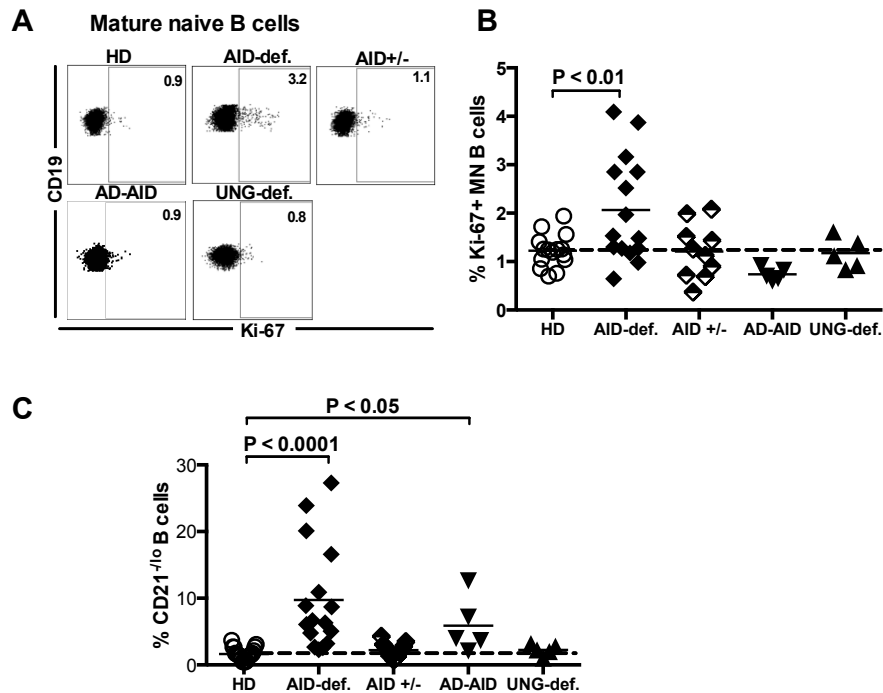

**Supplemental Figure 3. Increased mature naïve B cell proliferation and percentage of CD21<sup>-lo</sup> B cells in AID-deficient patients.** (A) Representative dot plots of Ki-67 staining on mature naïve B cells. (B) Summary of the Ki-67 staining shows a higher percentage of cycling mature naïve B cells in AID deficient patients (n= 15) compared to HD (n=15), AID<sup>+/-</sup> (n=10), AD-AID (n=4) or UNG-deficient patients (n=5). (C) Percentages of CD19<sup>+</sup>CD27<sup>-</sup>CD10<sup>-</sup>CD21<sup>-lo</sup> B-cells in HD (n=21) compared to AID-deficient patients (n=16), AID<sup>+/-</sup> (n=15), AD-AID patients (n=5) or UNG-deficient patients (n=4). Solid lines indicate means, dashed lines show the mean of the HD. P values were obtained with ANOVA using Dunnett correction for testing multiple comparisons.

**Figure S4**

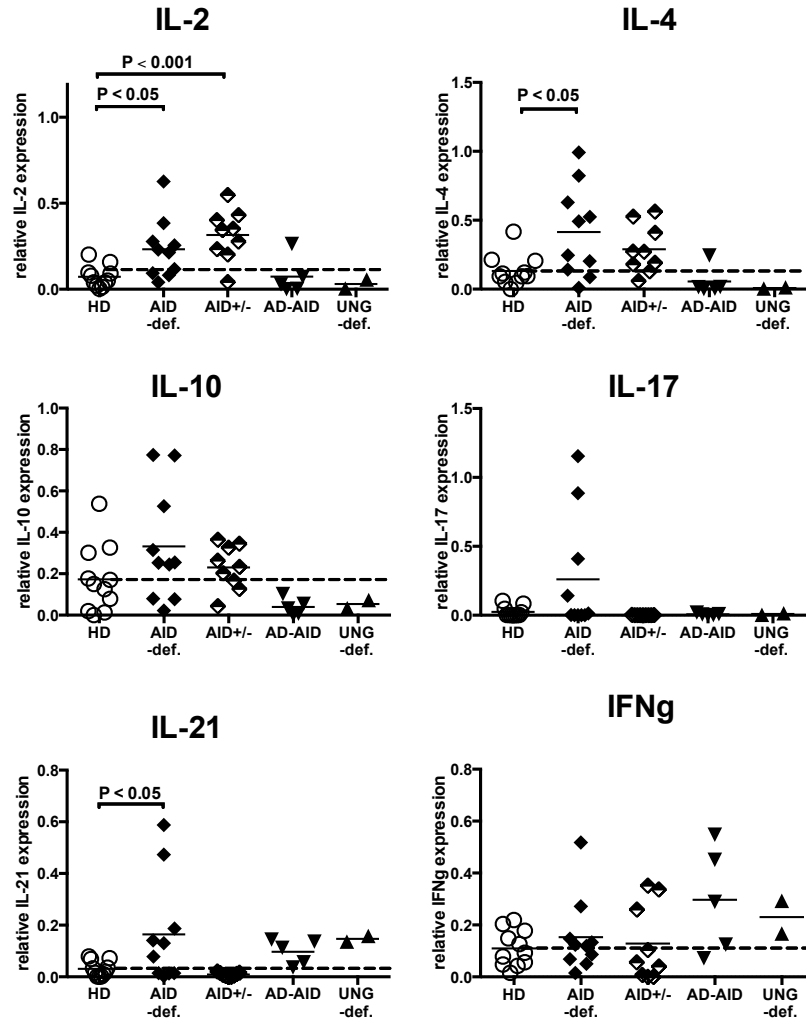

**Supplemental Figure 4. Increased cytokine production by Tresp of subjects carrying *AICDA* gene mutation(s).** Quantitative real-time PCR of CD4<sup>+</sup> sorted cells shows cytokine transcripts in AID-deficient patients (n=10), AID<sup>+/-</sup> (n=9), AD-AID (n=5) and UNG-deficient patients (n=2) compared to HD (n=11). Solid lines indicate means, dashed lines show the mean of HD for comparison. P values were obtained with ANOVA using Dunnett correction for testing multiple comparisons.

**Figure S5**

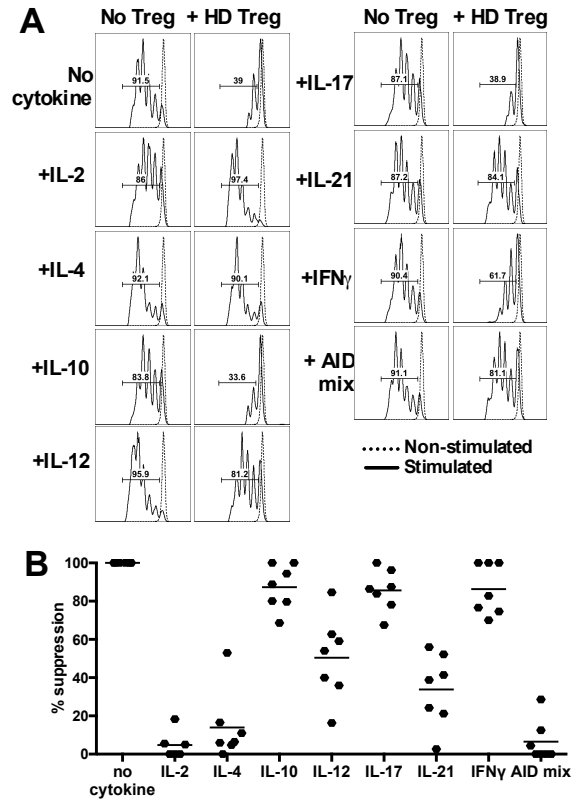

**Supplemental Figure 5. Cytokines produced by Tresp in subjects with mutations in *AICDA* block Treg suppression *in vitro*.** (A) Representative histograms of Treg mediated suppression of autologous CFSE labeled Tresp cells on day 4.5 from a healthy donor in the presence of the indicated cytokines. Dashed line display non-stimulated Tresp. The “AID mix” contains IL-2, IL-4, IL-10, IL-17, IL-21, and IFN $\gamma$ , all of which are increased in AID-deficient patients. The suppressive activity of Tregs in presence of various cytokines is summarized in (B) (n=7), where the suppressive capacity of Tregs in co-culture without cytokines of each individual donor is normalized to 100%. Lines show mean.

**Figure S6**

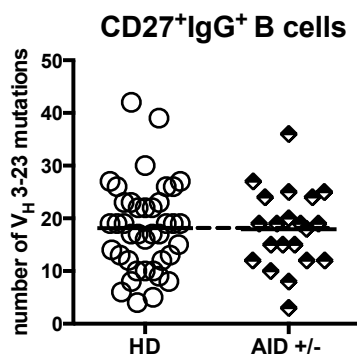

**Supplemental Figure 6. Similar SHM frequencies in IgG sequences encoded by *VH3-23* genes between HD and AID<sup>+/-</sup> heterozygotes.** The number of mutations in *V<sub>H</sub>3-23* sequences derived from single CD19<sup>+</sup>CD21<sup>+</sup>CD27<sup>+</sup>IgG<sup>+</sup> memory B cells are shown. Each sequence is depicted by a symbol, solid line represents the mean in AID<sup>+/-</sup> heterozygotes while the dashed line the mean of HD for comparison.

**Supplemental Table 1:** Characteristics of patients with *AICDA* or *UNG* mutations and heterozygote asymptomatic relatives

| Patient number | Ethnic group    | Sex | Age at diagnosis (yr) | Current age (yr) | Serum immunoglobulins in mg/dl |      |      | Clinical Manifestations                                                            | Mutation in AICDA gene        | Mutation in AID          | Inheritance |
|----------------|-----------------|-----|-----------------------|------------------|--------------------------------|------|------|------------------------------------------------------------------------------------|-------------------------------|--------------------------|-------------|
|                |                 |     |                       |                  | IgM                            | IgA  | IgG  |                                                                                    |                               |                          |             |
| AID-def.1*     | Moroccan        | M   | 5                     | 22               | 240                            | <7   | 40   | lymphoid hyperplasia, recurrent infections                                         | 203 G>A / 175-184 del         | W68X / H25-E58 del insV  | AR          |
| AID-def.2*     | Moroccan        | M   | 1                     | 16               | 150                            | <7   | <6   | recurrent infections                                                               | 203 G>A / 175-184 del         | W68X / H25-E58 del insV  | AR          |
| AID-def.4      | Moroccan        | M   | 1                     | 20               | 100                            | <7   | <6   | lymphoid hyperplasia, recurrent infections                                         | 203 G>A / del                 | W68X / 0                 | AR          |
| AID-def.5      | Turkish         | M   | 11                    | 21               | 1150                           | <5.8 | 264  | lymphoid hyperplasia, recurrent infections                                         | 415 A>G / 415 A>G             | M139V / M139V            | AR          |
| AID-def.6      | Pakistani       | M   | 4                     | 4                | 4000                           | <7   | <7   | recurrent infections                                                               | 394 G>C / 394 G>C             | A132P / A132P            | AR          |
| AID-def.8      | French Canadian | F   | 28                    | 60               | 8830                           | <60  | na   | lymphoid hyperplasia, recurrent infections                                         | 334 C>T / 334 C>T             | R112C / R112C            | AR          |
| AID-def.9      | French Canadian | F   | 5                     | 26               | 451                            | <30  | 178  | lymphoid hyperplasia, recurrent infections                                         | 334 C>T / 334 C>T             | R112C / R112C            | AR          |
| AID-def.10     | French Canadian | F   | 3                     | 22               | 621                            | 40   | 60   | recurrent infections                                                               | 334 C>T / 334 C>T             | R112C / R112C            | AR          |
| AID-def.11     | French Canadian | M   | 2                     | 50               | 6800                           | <60  | na   | recurrent infections                                                               | 334 C>T / 334 C>T             | R112C / R112C            | AR          |
| AID-def.17     | Turkish         | M   |                       | 18               |                                |      |      |                                                                                    | 415 A>G / 415 A>G             | M139V / M139V            | AR          |
| AID-def.19     | Kuwait          | M   | 1                     | 5                | 223                            | < 6  | < 33 | lymphoid hyperplasia, recurrent infections                                         | 254 G>A / 254 G>A             | S85N / S85N              | AR          |
| AID-def.20     | Kuweit          | M   | 1.5                   | 16               | 408                            | 40   | <30  | lymphoid hyperplasia, recurrent infections                                         | 254 G>A / 254 G>A             | S85N / S85N              | AR          |
| AID-def.22*    | Kuweit          | M   | 3                     | 14               | 1800                           | < 7  | < 7  | lymphoid hyperplasia, recurrent infections                                         | 254 G>A / 254 G>A             | S85N / S85N              | AR          |
| AID-def.23*    | Kuweit          | M   | 8.5                   | 13               | 677                            | < 6  | < 33 | lymphoid hyperplasia, recurrent infections                                         | 254 G>A / 254 G>A             | S85N / S85N              | AR          |
| AID-def.25     | Ukraine         | F   | 12                    | 39               | 1367                           | 5    | 51   | recurrent pneumonias, Lymphoid hyperplasia, nodular regenerative hyperplasia liver | del exon1/del exon1           | 0/0                      | AR          |
| AID-def.26     | French          | M   | 6                     | 10               | 140                            | <7   | <7   |                                                                                    |                               | C87R / C147X             | AR          |
| AID-def.27     | French Canadian | M   |                       |                  |                                |      |      |                                                                                    | 334 C>T / 334 C>T             | R112C / R112C            | AR          |
| AD-AID 12      | French          | F   | 71                    | 76               | 203                            | <7   | 130  | recurrent infections                                                               | 568 C>T / Normal              | R190X / Normal           | AD          |
| AD-AID 13      | Japan           | M   | 13                    | 31               | 156                            | <29  | <158 |                                                                                    | 568 C>T / Normal              | R190X / Normal           | AD          |
| AD-AID 14      | Japan           | F   |                       | 58               |                                |      |      |                                                                                    | 568 C>T / Normal              | R190X / Normal           | AD          |
| AD-AID 18      | Turkish         | M   |                       | 17               |                                |      |      |                                                                                    | 559 del/ Normal               | V186X/ Normal            | AD          |
| AD-AID 28      | Japan           | F   | 26                    | 39               | 1030                           | <5   | 83   | recurrent infections                                                               | 568 C>T / Normal              | R190X / Normal           | AD          |
| AID+/- 1M      | Moroccan        | F   |                       | adult            |                                |      |      | healthy                                                                            | 203 G>A/ Normal               | W68X/ Normal             | HET         |
| AID+/- 1F      | Moroccan        | M   |                       | adult            |                                |      |      | healthy                                                                            | 175-184 del                   | H25-E58 del insV/ Normal | HET         |
| AID+/- 6F      | Pakistani       | M   |                       | adult            |                                |      |      | adult                                                                              | 394 G>C / Normal              | A132P / Normal           | HET         |
| AID+/- 6M      | Pakistani       | F   |                       | adult            |                                |      |      | adult                                                                              | 394 G>C / Normal              | A132P / Normal           | HET         |
| AID+/-17F      | Turkish         | M   |                       | adult            |                                |      |      | healthy                                                                            | 415 A>G/ Normal               | M139V/ Normal            | HET         |
| AID+/-17M      | Turkish         | F   |                       | adult            |                                |      |      | healthy                                                                            | 415 A>G/ Normal               | M139V/ Normal            | HET         |
| AID +/- 19F    | Kuweit          | M   |                       | 35               |                                |      |      | healthy                                                                            | 254 G>A/ Normal               | S85N/ Normal             | HET         |
| AID +/- 20F    | Kuweit          | M   |                       | 48               |                                |      |      | healthy                                                                            | 254 G>A/ Normal               | S85N/ Normal             | HET         |
| AID +/- 22M    | Kuweit          | F   |                       | 33               |                                |      |      | healthy                                                                            | 254 G>A/ Normal               | S85N/ Normal             | HET         |
| AID+/- 26M     | French          | F   |                       | 41               |                                |      |      | healthy                                                                            |                               | C87R/ Normal             | HET         |
| AID+/- 27B     | French Canadian | M   |                       | 57               |                                |      |      | healthy                                                                            | 334 C>T / Normal              | R112C / Normal           | HET         |
| AID+/-27S      | French Canadian | F   |                       | 47               |                                |      |      | healthy                                                                            | 334 C>T / Normal              | R112C / Normal           | HET         |
| UNG-def.1      | USA             | M   | 39                    | 40               | 785                            | <7   | 209  | lymphoid hyperplasia, recurrent infections                                         | 497,498 del AT/497,498 del AT | frameshift               | AR          |
| UNG-def.2      | Japan           | F   | 3                     | 12               | 267                            | 25   | <50  | recurrent infections                                                               | T822C/T822C                   | F251S/F251S              | AR          |
| UNG-def.3      | French          | M   | 7                     | 26               | 740                            | 48   | 50   | recurrent infections                                                               | 462 delC /639,640 delTA       | frameshift               | AR          |
| UNG-def.4      | The Netherlands | F   | 22                    | 31               | 6800                           | 20   | <1   | recurrent infections                                                               | 392 delC/392 delC             | frameshift               | AR          |
| UNG-def.5      | The Netherlands | M   | 18                    | 22               | 50                             | 30   | 150  | recurrent infections                                                               | 330_632delCCT/630_632delCC1   | del L210/ del L210       | AR          |

\* siblings

AR: autosomal recessive

AD: autosomal dominant

HET: heterozygote

**Supplemental Table 2:** primers used for detection of cytokines

| <b>cytokine</b> | <b>Forward Primer Sequence 5'-3'</b> | <b>Reverse Primer Sequence 3'-5'</b> |
|-----------------|--------------------------------------|--------------------------------------|
| IL-2            | ATGAGACAGCAACCATTGTAGAATTT           | CACTTAATTATCAAGTCAGTGTTGAGATGA       |
| IL-4            | ATGGGTCTCACCTCCCAACT                 | GATGTCTGTTACGGTCAACTCG               |
| IL-10           | GGAGGACTTTAAGGGTTACCTG               | TCTTGGAGCTTATTAAAGGCATTC             |
| IL-17           | CCCAAATTCTGAGGACAAGAAC               | AGGGATATCTCTCAGGGTCCTC               |
| IL-21           | TTCTGCCAGCTCCAGAAGAT                 | TTTGTGGAAGGTGGTTTCCTC                |
| IFN $\gamma$    | AAACGAGATGACTTCGAAAAGC               | CATCTGACTCCTTTTTTCGCTTC              |



**Supplemental Table 3:** Repertoire and reactivity of antibodies from mature naive B cells of AID-def. patient 1.

| Ig         | HEAVY  |      |    |    |                        |        | LIGHT |    |             |        | REACTIVITY |      |          |
|------------|--------|------|----|----|------------------------|--------|-------|----|-------------|--------|------------|------|----------|
|            | VH     | D    | RF | JH | CDR3(aa)               | Length | Vκ    | Jκ | CDR3(aa)    | Length | Poly       | Hep2 | Staining |
| mAID1 1    | 4-59   | 6-13 | 2  | 5  | QREGSSSWYKRAWFDP       | 17     | 1-33  | 4  | QQYDNLPT    | 9      | -          | -    | -        |
| mAID1 10   | 4-34   | 2-2  | 3  | 6  | DLGTADIVVPAAMMEDYYGMDV | 23     | 1-39  | 5  | QQRSNWSIT   | 9      | -          | -    | -        |
| mAID1 27   | 3-21   | /    | /  | 6  | EGEGYYYGMDV            | 11     | 1-39  | 1  | QQSYSTPWT   | 9      | -          | -    | -        |
| mAID1 29   | 4-39   | 2-8  | 3  | 6  | QSSPSDPSLIVLMPYYYYMDV  | 21     | 3-15  | 4  | QQYNNWPPLT  | 10     | +          | -    | -        |
| mAID1 32   | 3-11   | 3-9  | 2  | 5  | DILTGASSLDP            | 11     | 1-39  | 2  | QQSYSTPPYT  | 10     | -          | -    | -        |
| mAID1 43   | 4-39   | 6-6  | 2  | 4  | LNEYSSSTFDY            | 11     | 1-39  | 2  | QQSYSTPYT   | 9      | -          | +    | C        |
| mAID1 48   | 3-21   | 3-22 | 3  | 4  | GRTMIVVVTNPFYD         | 14     | 1-5   | 2  | QQYNSYSYS   | 9      | +          | +    | F        |
| mAID1 55 # | 3-21   | 3-10 | 3  | 6  | DSPRITMSPEASHEYYYYYMDV | 24     | 1-39  | 2  | QQSYSTPITFG | 11     |            |      |          |
| mAID1 58 # | 1-18   | 3-3  | 3  | 4  | VPTIFGVVLMYFDY         | 15     | 3-20  | 1  | QQYGSSPWT   | 9      |            |      |          |
| mAID1 60   | 4-61   | 6-6  | 3  | 5  | EIIARHWFD              | 11     | 1-33  | 3  | QQYDNLPR    | 9      | +          | +    | N        |
| mAID1 62 # | 4-59   | 2-8  | 3  | 5  | RSGNGVGLNWFDP          | 14     | 1-33  | 5  | QQSYSTPHT   | 9      |            |      |          |
| mAID1 68   | 4-39   | /    |    | 4  | RERSHRSLNYFDY          | 13     | 1-39  | 1  | QQSYSTPWT   | 9      | +          | +    | -        |
| mAID1 70 # | 1-18   | 3-3  | 3  | 4  | VPTIFGVVLMYFDY         | 15     | 1-33  | 4  | QQYDNLPLT   | 9      |            |      |          |
| mAID1 72   | 3-33   | 2-2  | 2  | 3  | DRGYCSSTCYRNFAD        | 17     | 3-11  | 3  | QQRSNWPPLFT | 11     | -          | -    | C        |
| mAID1 82   | 4-30-4 | 5-5  | 2  | 4  | APRYSYGYGDY            | 11     | 3-15  | 1  | QQYNNWPWT   | 10     | -          | +    | -        |
| mAID1 83   | 3-33   | 2-2  | 2  | 6  | AGYCSSTSCYGNYYMDV      | 18     | 1-12  | 3  | QQANSFPVT   | 9      | -          | +    | N        |
| mAID1 84   | 4-59   | 2-15 | 3  | 5  | HGGVADDWFDP            | 12     | 4-1   | 2  | QQYYSTPYS   | 9      | -          | -    | -        |
| mAID1 85   | 3-21   | /    |    | 5  | DPGMRRDSNWFDP          | 13     | 1-33  | 2  | QQYDNLPLY   | 9      | -          | -    | -        |
| mAID1 86   | 4-34   | 6-19 | 1  | 1  | SPQWLKQKTGYFQH         | 14     | 1-8   | 1  | QQYYSYPR    | 9      | +          | +    | C        |
| mAID1 88   | 3-30-3 | 2-2  | 2  | 5  | NYCSSTSCYMYWFD         | 15     | 3-15  | 4  | QQYNNWPLT   | 9      | -          | +    | -        |
| mAID1 92   | 3-48   | /    |    | 6  | ELNPVGEFYYYYYMDV       | 16     | 3-20  | 2  | QQYGSSPPYS  | 10     | -          | -    | -        |
|            | VH     | D    | RF | JH | CDR3(aa)               | Length | Vλ    | Jλ | CDR3(aa)    | Length | Poly       | Hep2 | Staining |
| mAID1 4    | 3-64   | 3-3  | 2  | 6  | GWAGGGYPHYMDV          | 15     | 1-44  | 2  | AAWDDSLNGVV | 11     | -          | +    | -        |
| mAID1 5    | 4-34   | 4-17 | 2  | 5  | THDDYGDSNWFDP          | 13     | 2-23  | 3  | CSYAGSSTFV  | 10     | -          | -    | -        |
| mAID1 08   | 4-59   | /    | /  | 6  | SPVADYYYYMDV           | 12     | 2-8   | 2  | SSYAGSNV    | 10     | -          | +    | -        |
| mAID1 14   | 3-23   | 3-22 | 2  | 4  | EYYDSSGYREPEIDY        | 15     | 2-23  | 2  | CSYAGSSTFKV | 11     | -          | -    | -        |
| mAID1 25   | 3-30-3 | 2-2  | 2  | 6  | DLYQLLPGYYYYYMDV       | 17     | 2-11  | 2  | CSYAGSYGGV  | 10     | -          | +    | -        |
| mAID1 41   | 3-23   | 6-6  | 1  | 6  | AGFKQLVPHLYYGM         | 17     | 1-40  | 2  | QSYDSSLGAVV | 12     | -          | -    | -        |
| mAID1 66   | 1-8    | 3-10 | 2  | 6  | GNSWSGEFYNYGMDV        | 17     | 2-23  | 1  | CSYAGSSTPYV | 11     | -          | -    | -        |
| mAID1 77   | 4-31   | 2-15 | 2  | 4  | GRRYCSGGSCYHFDY        | 15     | 8-61  | 3  | VLYMGSGISV  | 10     | -          | -    | N        |
|            | VH     | D    | RF | JH | CDR3(aa)               | Length |       |    |             |        |            |      |          |
| mAID1 2    | 3-74   | 2-15 | 3  | 4  | DLEDIVVVAATTFGY        | 16     |       |    |             |        |            |      |          |
| mAID1 9    | 4-34   | 6-13 | 3  | 6  | GEAAAGNYYYYYMDV        | 16     |       |    |             |        |            |      |          |
| mAID1 36   | 3-33   | 1-7  | 3  | 5  | SGITGTTDRCWFD          | 14     |       |    |             |        |            |      |          |
| mAID1 52   | 3-30   | /    |    | 6  | FSVPTARYYYYYMDV        | 14     |       |    |             |        |            |      |          |
| mAID1 63   | 3-7    | 4-17 | 2  | 4  | TKIYGDYGYFDY           | 12     |       |    |             |        |            |      |          |

RF, reading frame; #, antibody failed to be expressed

-, non-reactive; +, reactive;

C, diffuse cytoplasmic staining; N, nuclear staining; F, cytoplasmic fibers; V, vesicles

Supplemental Table 4: Repertoire and reactivity of antibodies from mature naive B cells of AID-def. patient 17.

| Ig          | HEAVY |      |    |    |                      | LIGHT  |      |    |              |        | REACTIVITY |      |          |
|-------------|-------|------|----|----|----------------------|--------|------|----|--------------|--------|------------|------|----------|
|             | VH    | D    | RF | JH | CDR3(aa)             | Length | Vκ   | Jκ | CDR3(aa)     | Length | Poly       | Hep2 | Staining |
| mAID17 49   | 3-33  | 6-13 | 2  | 6  | DLGSSSWYDYYYYYGMDV   | 18     | 2-28 | 5  | MQALQTPPIT   | 10     | -          | +    | -        |
| mAID17 50   | 3-23  | 1-26 | 2  | 4  | SGIPSTRKTSGSSDY      | 15     | 1-27 | 3  | QKYNSAPFT    | 9      | +          | +    | N        |
| mAID17 64 # | 7-4-1 | 1-26 | 3  | 5  | EGVGGNWFDP           | 10     | 3-20 | 1  | QQYGSSHVT    | 9      |            |      |          |
| mAID17 68   | 4-59  | 3-10 | 3  | 4  | DVRSAFFDY            | 9      | 3-11 | 4  | QQRSNWPLT    | 9      | -          | +    | -        |
| mAID17 75   | 3-7   | 3-10 | 2  | 4  | GRYYYYY              | 7      | 1-16 | 2  | QQYNSYPYT    | 9      | +          | +    | N        |
| mAID17 80   | 4-34  | 6-19 | 3  | 4  | AVAGRVLGY            | 9      | 3-20 | 1  | QQYGSSPRT    | 9      | -          | -    | -        |
| mAID17 81   | 3-15  | /    | /  | 4  | SSGALFDY             | 8      | 3-15 | 2  | QQYNNWPPCS   | 10     | -          | +    | -        |
| mAID17 94 # | 3-33  | 2-2  | 1  | 1  | SDQLLLVGYFQH         | 12     | 1-5  | 4  | QQYGSNSLT    | 9      |            |      |          |
| mAID17 96   | 3-23  | 6-19 | 3  | 4  | SLKRGVAAPGGY         | 12     | 3-20 | 4  | QQYGSSPLT    | 9      | +          | +    | N        |
| mAID17 51   | VH    | D    | RF | JH | CDR3(aa)             | Length | Vλ   | Jλ | CDR3(aa)     | Length | Poly       | Hep2 | Staining |
| mAID17 51   | 3-66  | /    | /  | 6  | GHYGMDV              | 7      | 1-47 | 3  | AAWDDSLSGRV  | 11     | +          | -    | -        |
| mAID17 64   |       |      |    |    | see kappa            |        | 1-40 | 2  | QSYDSSLVL    | 10     | -          | -    | -        |
| mAID17 70   | 4-34  | 3-22 | 2  | 4  | GEGSGWYGDYYYDSSGYSSY | 20     | 6-57 | 3  | QSYDSSNHKV   | 10     | -          | -    | -        |
| mAID17 74   | 4-34  | 2-21 | 3  | 3  | GGSTPPHIVVTAIPEYAFDI | 21     | 2-23 | 2  | CSYAGSSTFV   | 11     | -          | +    | -        |
| mAID17 87   | 3-23  | 4-23 | 2  | 2  | SNYGGNWLNWYFDL       | 15     | 3-21 | 1  | QVWDSSSDPHYV | 12     | +          | +    | F        |
| mAID17 88 # | 3-66  | 3-22 | 2  | 4  | DPYYYDSSFGY          | 11     | 7-46 | 2  | LLSYSGARV    | 9      |            |      |          |
| mAID17 89   | 3-11  | 4-23 | 2  | 3  | EANGGRAFDI           | 10     | 2-23 | 2  | CSYAGSSTFV   | 11     | -          | -    | -        |
| mAID17 73   |       |      |    |    |                      |        | 3-21 | 1  | QVWDSSSDHV   | 10     |            |      |          |
|             | VH    | D    | RF | JH | CDR3(aa)             | Length |      |    |              |        |            |      |          |
| mAID17 54   | 3-23  | 3-3  | 2  | 4  | GLYDFWWSGYLDC        | 13     |      |    |              |        |            |      |          |
| mAID17 57   | 1-69  | 3-22 | 2  | 1  | GPFNYDSSGSAEYFQH     | 17     |      |    |              |        |            |      |          |
| mAID17 66   | 1-18  | 1-26 | 2  | 4  | DWSYYPADY            | 9      |      |    |              |        |            |      |          |
| mAID17 71   | 4-34  | 6-13 | 2  | 4  | GDSSSWWIYFDY         | 12     |      |    |              |        |            |      |          |
| mAID17 72   | 3-21  | 3-3  | 2  | 4  | DGGGGSGYETYFDY       | 14     |      |    |              |        |            |      |          |
| mAID17 85   | 4-39  | 6-13 | 3  | 4  | HVLSIAAAGTVSGFIDY    | 17     |      |    |              |        |            |      |          |
| mAID17 92   | 1-18  | 3-22 | 2  | 4  | GKDYDSSGYVVDY        | 14     |      |    |              |        |            |      |          |

RF, reading frame; #, antibody failed to be expressed

-, non-reactive; +, reactive;

C, diffuse cytoplasmic staining; N, nuclear staining; F, cytoplasmic fibers; V, vesicles

**Supplemental Table 5:** Repertoire and reactivity of antibodies from mature naive B cells of AID+/- healthy donor 1F

| Ig          | HEAVY     |      |    |    |                        |        | LIGHT |    |             |        | REACTIVITY |      |          |
|-------------|-----------|------|----|----|------------------------|--------|-------|----|-------------|--------|------------|------|----------|
|             | VH        | D    | RF | JH | CDR3 (aa)              | Length | Vκ    | Jκ | CDR3 (aa)   | Length | Poly       | Hep2 | Staining |
| mAID1F 27   | 3-15      | 3-3  | 2  | 4  | PYSVYYDFWSGSPDGNN      | 17     | 3-20  | 1  | QQYGSSPRT   | 9      | -          | -    | -        |
| mAID1F 46   | 4-39      | 4-4  | 3  | 4  | SIIFQTTVTSFDY          | 13     | 3-20  | 3  | QQYGSSPIT   | 9      | +          | -    | -        |
| mAID1F 49   | 4-34      | 6-6  | 3  | 4  | PGTKHRIAHRGCFAY        | 16     | 3-11  | 4  | QQRSNWPPLT  | 10     | +          | +    | V        |
| mAID1F 59   | 1-58      | 4-17 | 2  | 4  | SVRGYGDVQGTGDY         | 13     | 3-11  | 1  | QQRSNWPPWT  | 10     | -          | -    | -        |
| mAID1F 65   | 3-74      | 3-22 | 2  | 3  | RFKSSGLFADAFDI         | 14     | 1-8   | 4  | QQYYSYPQT   | 9      | -          | -    | -        |
| mAID1F 69   | 3-23      | 3-22 | 2  | 4  | DPSDPYYDSSGGYYSYGY     | 17     | 1-16  | 3  | QQYNSYPLT   | 9      | -          | -    | -        |
| mAID1F 72   | 1-18      | 3-22 | 2  | 4  | YYYDSSGYYIDY           | 13     | 3-11  | 4  | QQRSNWPRIT  | 10     | +          | +    | F        |
| mAID1F 76   | 1-69      | 4-17 | 3  | 6  | AATVTTFFPKGGYYYYMDV    | 19     | 3-15  | 2  | QQYNNWPPDT  | 10     | +          | +    | -        |
| mAID1F 82   | 3-30      | 3-22 | 2  | 4  | DFVGVNYYDSSGYFDY       | 16     | 3-20  | 4  | QQYGSSPSLT  | 10     | -          | -    | -        |
| mAID1F 83   | 3-23      | 2-15 | 2  | 2  | AGRSHRPWVWYFDL         | 15     | 1-27  | 4  | QKYNAPRALT  | 11     | +          | +    | N        |
| mAID1F 95   |           |      |    |    |                        |        | 1-5   | 2  | QQYNSYSPYT  | 10     |            |      |          |
| mAID1F 84   |           |      |    |    |                        |        | 3-11  | 3  | QQRSNFIFT   | 9      |            |      |          |
|             | VH        | D    | RF | JH | CDR3 (aa)              | Length | Vλ    | Jλ | CDR3 (aa)   | Length | Poly       | Hep2 | Staining |
| mAID1F 41   | 4-61      | 4-23 | 2  | 6  | LPTVVPEEAGYYYYGMDV     | 18     | 1-40  | 3  | QSYDSSLSV   | 9      | -          | -    | -        |
| mAID1F 46   | see kappa |      |    |    |                        |        | 3-1   | 2  | QAWDSSMVV   | 9      | +          | -    | -        |
| mAID1F 63   | 3-21      | 1-26 | 2  | 4  | GGGMGMYSGSYEGMSGRPPFDY | 23     | 3-1   | 3  | QAWDSSTA    | 8      | -          | +    | -        |
| mAID1F 64   | 3-48      | 1-26 | 3  | 4  | SLIVGATSGSYDY          | 13     | 3-10  | 2  | YSTDSSGNHRV | 11     | -          | +    | -        |
| mAID1F 67   | 4-61      | 2-2  | 3  | 6  | VVVVPAATKYYYYGMDV      | 17     | 3-25  | 2  | QSADSSGTLV  | 10     | -          | +    | N        |
| mAID1F 73   | 4-39      | 6-19 | 2  | 4  | HVSPEESGFDY            | 11     | 3-1   | 1  | QAWDSSTAWSV | 11     | -          | -    | -        |
| mAID1F 75   | 4-31      | 4-17 | 2  | 4  | QLYGDYLLDY             | 10     | 3-21  | 2  | QVWDSSSDHVV | 11     | -          | -    | -        |
| mAID1F 81   | 3-15      | 1-20 | 2  | 6  | RYWNDVSGMDV            | 11     | 3-1   | 2  | QAWDSSTEV   | 9      | -          | -    | -        |
| mAID1F 86   | 1-8       | 1-26 | 2  | 3  | IPSQSGSVVAFDI          | 13     | 3-1   | 2  | QAWDSSTVV   | 9      | -          | -    | -        |
| mAID1F 89   | 1-58      | 5-5  | 2  | 3  | DGYSGRYAFDI            | 12     | 3-25  | 3  | QSADSSGTYWV | 11     | -          | -    | -        |
| mAID1F 92 # | 4-4       | 4-23 | 2  | 2  | TLYGGKDDL              | 9      | 1-47  | 1  | AAWDDSLSL   | 10     |            |      |          |
| mAID1F 85   |           |      |    |    |                        |        | 3-25  | 2  | QSADSSGSVV  | 10     |            |      |          |
| mAID1F 95   |           |      |    |    |                        |        | 3-10  | 2  | YSTDSSGNHRV | 11     |            |      |          |
|             | VH        | D    | RF | JH | CDR3 (aa)              | Length |       |    |             |        |            |      |          |
| mAID1F 57   | 3-23      | 1-7  | 2  | 4  | GYNWNQYYFDY            | 11     |       |    |             |        |            |      |          |
| mAID1F 60   | 4-39      | /    | /  | 4  | HESPDPVDY              | 10     |       |    |             |        |            |      |          |
| mAID1F 70   | 4-61      | 1-7  | 2  | 6  | GWSPGENYGMVDV          | 12     |       |    |             |        |            |      |          |

RF, reading frame; #, antibody failed to be expressed

-, non-reactive; +, reactive;

C, diffuse cytoplasmic staining; N, nuclear staining; F, cytoplasmic fibers; V, vesicles

**Supplemental Table 6:** Repertoire and reactivity of antibodies from mature naive B cells of AID+/- healthy donor 1M

| Ig          | HEAVY |      |    |    |                     | LIGHT  |      |    |              |        | REACTIVITY |      |          |
|-------------|-------|------|----|----|---------------------|--------|------|----|--------------|--------|------------|------|----------|
|             | VH    | D    | RF | JH | CDR3 (aa)           | Length | Vκ   | Jκ | CDR3 (aa)    | Length | Poly       | Hep2 | Staining |
| mAID1M 51   | 4-59  | 2-2  | 3  | 6  | DSEPLPAAISNYYYYGMDV | 19     | 2-28 | 1  | MQALQTRT     | 8      | -          | -    | -        |
| mAID1M 58   | 4-59  | 6-6  | 3  | 4  | DRIAAGGIDY          | 10     | 1-9  | 4  | QQLNSYPLT    | 0      | -          | +    | -        |
| mAID1M 59   | 3-30  | 6-13 | 2  | 6  | EGGSSWFGASNYYYYGMDV | 19     | 1-5  | 2  | QQYNSYS      | 7      | +          | +    | C        |
| mAID1M 62   | 3-9   | 1-26 | 3  | 6  | DAVGATTGDSMDV       | 13     | 1-8  | 4  | QQYYSYPLT    | 10     | -          | -    | -        |
| mAID1M 68   | 3-33  | 3-3  | 1  | 4  | DQEEWSDSYFDY        | 13     | 4-1  | 5  | QQYYSTPPGGIT | 12     | -          | -    | -        |
| mAID1M 69   | 3-9   | 6-19 | 2  | 6  | QSGWYEPYGMVDV       | 13     | 3-20 | 3  | QQYGSSRVT    | 9      | -          | +    | -        |
| mAID1M 71   | 3-7   | 4-23 | 1  | 6  | EGGRVRWPYYYYGMDV    | 17     | 1-8  | 1  | QQYYSYPPGT   | 10     | +          | +    | C        |
| mAID1M 75 # | 4-4   | /    | /  | 5  | AHSMWFDP            | 9      | 3-15 | 2  | QQYNNWPPA    | 9      |            |      |          |
| mAID1M 77   | 1-24  | 3-3  | 1  | 4  | VRFLEWLFHY          | 10     | 3-20 | 5  | QQYGSSHT     | 8      | -          | -    | -        |
| mAID1M 83   | 1-46  | 2-2  | 2  | 4  | DLPYCSSTSCYFGDLDY   | 17     | 1-9  | 4  | QQLNSYPLT    | 9      | -          | -    | -        |
| mAID1M 86 # | 4-34  | 3-22 | 2  | 6  | LLTYYYYYGMDV        | 13     | 1-39 | 2  | QQSYSTPRS    | 9      |            |      |          |
| mAID1M 90   | 4-61  | 3-22 | 2  | 2  | LALEDSSGYAGLYFDL    | 16     | 3-11 | 4  | QQRSNLLT     | 8      | -          | -    | -        |
| mAID1M 93   | 4-31  | /    | /  | 4  | GIKSDPQIDY          | 10     | 3-20 | 2  | QQYGSSLVQ    | 9      | +          | +    | -        |
| mAID1M 95 # | 5-51  | 3-9  | 1  | 6  | SSALLRYFDWAPRGMVDV  | 17     | 3-20 | 1  | QQYGSSPWT    | 9      |            |      |          |
| mAID1M 73   |       |      |    |    |                     |        | 1-33 | 4  | QQYDNLPPA    | 9      |            |      |          |
|             | VH    | D    | RF | JH | CDR3 (aa)           | Length | Vλ   | Jλ | CDR3 (aa)    | Length | Poly       | Hep2 | Staining |
| mAID1M 63   | 3-43  | 5-12 | 2  | 6  | DLTVVSGYDFREPYGMDV  | 18     | 1-40 | 2  | QSYDSSPVV    | 9      | -          | -    | -        |
| mAID1M 66   | 3-23  | 1-7  | 3  | 5  | SRTGTTFLAFFSFDV     | 15     | 1-40 | 1  | QSYDSSLGPNYV | 13     | -          | -    | -        |
| mAID1M 67 # | 3-15  | 6-13 | 2  | 4  | RGYSSWYVDY          | 11     | 2-35 | 2  | QSADSSGTYLV  | 11     |            |      |          |
| mAID1M 77   |       |      |    |    | see kappa           |        | 1-47 | 2  | AAWDDSLKRV   | 10     | -          | -    | -        |
| mAID1M 87 # | 3-11  | 5-5  | 3  | 6  | VPMVSGYGMDV         | 11     | 3-1  | 2  | QAWDSSTPVV   | 10     |            |      |          |
| mAID1M 89   | 4-34  | 4-17 | 2  | 1  | VAFGDPRTSSG         | 11     | 3-1  | 2  | QAWDSSSTAKV  | 10     | -          | +    | -        |
| mAID1M 72   |       |      |    |    |                     |        | 2-8  | 1  | SSYAGSNYV    | 9      |            |      |          |
|             | VH    | D    | RF | JH | CDR3 (aa)           | Length |      |    |              |        |            |      |          |
| mAID1M 61   | 4-31  | 3-22 | 2  | 4  | LFGAGSGYGGVDY       | 14     |      |    |              |        |            |      |          |
| mAID1M 70   | 4-39  | 5-24 | 2  | 6  | DIGPGDGYNYPFYGGMDV  | 22     |      |    |              |        |            |      |          |
| mAID1M 82   | 4-59  | 5-5  | 2  | 4  | GRYGYPADYFDY        | 13     |      |    |              |        |            |      |          |
| mAID1M 87   | 3-11  | 5-5  | 3  | 6  | VPMVSGYGMDV         | 11     |      |    |              |        |            |      |          |
| mAID1M 94   | 4-39  | 3-22 | 2  | 3  | RYYSVIGAFDI         | 11     |      |    |              |        |            |      |          |

RF, reading frame; #, antibody failed to be expressed

-, non-reactive; +, reactive;

C, diffuse cytoplasmic staining; N, nuclear staining; F, cytoplasmic fibers; V, vesicles

**Supplemental Table 7:** Repertoire and reactivity of antibodies from mature naive B cells of AID+/- healthy donor 6F

| Ig           | HEAVY |      |    |    |                       | Length | LIGHT |    |             |        | REACTIVITY |      |          |
|--------------|-------|------|----|----|-----------------------|--------|-------|----|-------------|--------|------------|------|----------|
|              | VH    | D    | RF | JH | CDR3 (aa)             |        | Vκ    | Jκ | CDR3 (aa)   | Length | Poly       | Hep2 | Staining |
| mAID6F 49    | 3-48  | /    | /  | 3  | RKGRAYDAFDI           | 11     | 1-33  | 4  | QQYDNLPLT   | 9      | -          | -    | -        |
| mAID6F 54    | 4-31  | 3-22 | 3  | 4  | GSPTMIKAAWFDFDY       | 16     | 1-39  | 1  | QQSYSTPWT   | 9      | +          | +    | -        |
| mAID6F 55    | 4-61  | 6-19 | 2  | 5  | VSYSSGWRKKNWFDP       | 15     | 1-12  | 4  | QQANSFPLT   | 9      | +          | +    | C        |
| mAID6F 57    | 3-49  | 3-16 | 2  | 4  | VRVEGDYVWGSYRTFDY     | 17     | 3-11  | 1  | QLEA        | 4      | -          | +    | -        |
| mAID6F 58    | 3-25  | 3-10 | 1  | 4  | REPQWFFDY             | 9      | 1-9   | 1  | QQLNSYHWT   | 9      | -          | +    | C        |
| mAID6F 59 #  | 3-33  | 2-15 | 2  | 5  | GAHCSGGSCYSEVDP       | 15     | 1-5   | 2  | QQYNSYPYT   | 9      |            |      |          |
| mAID6F 60 #  | 3-23  | 4-23 | 3  | 6  | ETTIVTPDYYYGMDV       | 16     | 2-30  | 1  | MQGTHWP     | 7      |            |      |          |
| mAID6F 67    | 3-15  | 2-2  | 3  | 4  | DPPDIVVPAAIGKY        | 16     | 3-11  | 4  | QQRSNWLPL   | 9      | +          | -    | -        |
| mAID6F 71    | 3-30  | 5-24 | 1  | 3  | DLGLQFTSDAFDI         | 13     | 1-16  | 4  | QQYNSYPLT   | 9      | -          | -    | -        |
| mAID6F 73    | 4-39  | 2-15 | 3  | 6  | DIVVVVAATRNYYYGMDV    | 18     | 3-15  | 1  | QQYNNWPPEGT | 11     | +          | -    | -        |
| mAID6F 75    | 5-51  | 3-10 | 3  | 4  | LGVMVRELDY            | 10     | 3-15  | 3  | QQYNNWPRFT  | 10     | -          | +    | -        |
| mAID6F 76    | 3-11  | 2-15 | 3  | 4  | TVVVVDH               | 6      | 2-30  | 1  | MQGTA       | 5      | -          | -    | -        |
| mAID6F 77    | 3-33  | 2-21 | 2  | 2  | VSPSNAYCGGDCYPDYWYFDL | 22     | 1-39  | 1  | QQSYSTPPA   | 9      | -          | -    | -        |
| mAID6F 79 #  | 3-33  | 3-22 | 2  | 3  | DRGGYESSGNRYSDI       | 17     | 3-15  | 3  | QQYNNWPPFT  | 10     |            |      |          |
| mAID6F 86    | 3-48  | 3-3  | 1  | 4  | VFEELLQTTYFDY         | 15     | 1-12  | 5  | QQANSFPIT   | 9      | -          | -    | -        |
| mAID6F 87    | 3-30  | 3-22 | 2  | 4  | ERRVWYDSSGYDY         | 14     | 4-1   | 4  | QQYSTPLT    | 9      | -          | +    | C        |
| mAID6F 89 #  | 1-18  | 1-7  | 3  | 4  | ARGGVAGTTARFDY        | 14     | 1-39  | 2  | QQSHTPYT    | 9      |            |      |          |
| mAID6F 91    | 3-48  | 2-2  | 3  | 6  | DRDVVPAAEVAYYYYGMDV   | 21     | 3-20  | 2  | QQYGSSPLYT  | 10     | -          | -    | -        |
| mAID6F 150 # | 4-34  | 2-2  | 3  | 3  | GQVVVPAASRLNAFDI      | 17     | 4-1   | 2  | QQYSTPTT    | 9      |            |      |          |
| mAID6F 164 # | 1-8   | 3-3  | 2  | 3  | VFWSGYFAFDI           | 11     | 3-11  | 1  | QQRSNWT     | 7      |            |      |          |
| mAID6F 169   | 3-23  | 6-6  | 3  | 6  | GAARPHYGRSYYYGMDV     | 17     | 2-28  | 3  | MQALQFTT    | 8      | +          | +    | -        |
| mAID6F 56    |       |      |    |    |                       |        | 1-17  | 2  | LQHNSYPRT   | 9      |            |      |          |
| mAID6F 74    |       |      |    |    |                       |        | 3-15  | 1  | QQYNNWPFWT  | 10     |            |      |          |
|              | VH    | D    | RF | JH | CDR3 (aa)             | Length | Vλ    | Jλ | CDR3 (aa)   | Length | Poly       | Hep2 | Staining |
| mAID6F 50    | 3-48  | /    | /  | 3  | RKGRAYDAFDI           | 11     | 1-40  | 2  | QSYDSSLGYYV | 12     | -          | -    | -        |
| mAID6F 61 #  | 4-61  | 2-2  | 3  | 6  | DRRIVVPAADYYYYGMDV    | 20     | 1-47  | 3  | AAWDDSLSGWV | 11     |            |      |          |
| mAID6F 62    | 4-59  | 5-5  | 3  | 4  | LLHARAMVYFDY          | 12     | 1-51  | 2  | GTWDSSLSAVV | 11     | -          | +    | -        |
| mAID6F 68    | 4-61  | 6-25 | 2  | 4  | GYSSPKIDY             | 9      | 6-57  | 3  | QSYDSRVVV   | 9      | -          | -    | -        |
| mAID6F 70    | 3-33  | 6-13 | 3  | 6  | DPGIAAAGTPVPEPLDGMDV  | 21     | 1-44  | 3  | AAWDDSLNGWV | 11     | -          | -    | -        |
| mAID6F 71 #  | 3-30  | 5-24 | 1  | 3  | DLGLQFTSDAFDI         | 13     | 3-25  | 2  | QSADSSGTYVV | 11     |            |      |          |
| mAID6F 79 #  | 3-33  | 3-22 | 2  | 3  | DRGGYESSGNRYSDI       | 17     | 2-23  | 2  | CSYAGSSTPV  | 10     |            |      |          |
| mAID6F 172   | 3-23  | 3-10 | 3  | 4  | DSAMVRGVISGYFDY       | 15     | 1-51  | 2  | GTWDSSLSAVV | 11     | -          | +    | -        |
|              | VH    | D    | RF | JH | CDR3 (aa)             | Length |       |    |             |        |            |      |          |
| mAID6F 52    | 3-9   | 5-24 | 3  | 4  | DSYPATIAKFDY          | 12     |       |    |             |        |            |      |          |
| mAID6F 64    | 4-4   | 3-9  | 3  | 4  | EGTITPFYD             | 9      |       |    |             |        |            |      |          |
| mAID6F 69    | 3-11  | 3-9  | 1  | 6  | SPTGGRYFDWSDYGMVDV    | 17     |       |    |             |        |            |      |          |
| mAID6F 72    | 3-15  | 1-26 | 3  | 3  | DVGANDAFAFDI          | 10     |       |    |             |        |            |      |          |
| mAID6F 88    | 1-46  | 3-10 | 2  | 6  | DIGVQGGSGSYHYYYGMDV   | 18     |       |    |             |        |            |      |          |
| mAID6F 89    | 1-18  | 1-7  | 3  | 4  | ARGGVAGTTARFDY        | 14     |       |    |             |        |            |      |          |
| mAID6F 90    | 4-39  | /    | /  | 4  | HASGAASSFPGGY         | 14     |       |    |             |        |            |      |          |

RF, reading frame; #, antibody failed to be expressed

-, non-reactive; +, reactive;

C, diffuse cytoplasmic staining; N, nuclear staining; F, cytoplasmic fibers; V, vesicles

**Supplemental Table 8:** Repertoire and reactivity of antibodies from mature naive B cells of AID+/- healthy donor 17M

| Ig           | HEAVY |      |    |    |                        | LIGHT  |      |    |             |        | REACTIVITY |      |          |
|--------------|-------|------|----|----|------------------------|--------|------|----|-------------|--------|------------|------|----------|
|              | VH    | D    | RF | JH | CDR3(aa)               | Length | Vκ   | Jκ | CDR3(aa)    | Length | Poly       | Hep2 | Staining |
| mAID17M 1    | 4-34  | 6-19 | 3  | 5  | GEGIAVNVWFDP           | 12     | 2-18 | 4  | MQATQFPKET  | 10     | -          | +    | C        |
| mAID17M 2 #  | 4-59  | /    |    | 6  | AHYGLPSMDV             | 10     | 1-33 | 5  | QQYDNLPIIT  | 9      |            |      |          |
| mAID17M 3    | 4-39  | 3-3  | 2  | 5  | GMTYYDFWSGYTSNWFDP     | 19     | 3-20 | 3  | QQYGSSPIFT  | 10     | +          | -    | C        |
| mAID17M 8    | 3-30  | 6-13 | 3  | 5  | ETIIAATGLYNWFDP        | 15     | 1-39 | 4  | QQSYSTPRT   | 9      | -          | +    | C        |
| mAID17M 14   | 4-31  | 2-15 | 3  | 5  | ESVVVAATLYWGWDFP       | 16     | 1-5  | 1  | QQYNSYRT    | 8      | +          | +    | -        |
| mAID17M 15   | 4-31  | 3-3  | 3  | 6  | DARITIFGVVTPGGMDV      | 17     | 3-20 | 1  | QQYGSYLGIT  | 9      | +          | -    | -        |
| mAID17M 18   | 3-11  | /    |    | 4  | TGYSSGWYLGVCRY         | 14     | 1-33 | 4  | QQYDNLPLIT  | 10     | -          | -    | -        |
| mAID17M 22   | 4-34  | 6-19 | 3  | 4  | GPGAVAGNPFDY           | 12     | 3-15 | 1  | QQYNNWPPWT  | 10     | -          | -    | -        |
| mAID17M 23   | 3-11  | 1-7  | 3  | 6  | RTGTYYYYYGMVDV         | 14     | 3-20 | 3  | QQYGSSPPGFT | 11     | -          | -    | C        |
| mAID17M 28   | 1-18  | /    |    | 4  | EAGGSKEDY              | 9      | 1-33 | 4  | QQYDNLPIIT  | 9      | -          | -    | C        |
| mAID17M 30   | 4-30  | /    |    | 4  | TKGARVFDY              | 9      | 3-15 | 1  | QQYNNWPPWT  | 9      | +          | +    | N        |
| mAID17M 32 # | 5-51  | /    |    | 6  | HRPVNGHTTARLSRYYYGMVDV | 21     | 1-12 | 4  | QQANSFPQIT  | 10     |            |      |          |
| mAID17M 35   | 3-11  | /    |    | 5  | ALGERLLPKGNWFDP        | 15     | 3-11 | 1  | QQRSNWPPTWT | 11     | -          | -    | C        |
| mAID17M 36   | 3-49  | /    | /  | 6  | DFNYPHYYYYYGMVDV       | 15     | 1-16 | 5  | QQYNSYPIT   | 9      | -          | -    | -        |
| mAID17M 47   | 3-7   | 6-19 | 3  | 6  | DPLIAVAGTHYYYYGMVDV    | 17     | 3-11 | 4  | QQRSNWPPLIT | 10     | +          | -    | -        |
| mAID17M 6    |       |      |    |    |                        |        | 1-39 | 1  | QQSYSSPWT   | 9      |            |      |          |
|              | VH    | D    | RF | JH | CDR3(aa)               | Length | Vλ   | Jλ | CDR3(aa)    | Length | Poly       | Hep2 | Staining |
| mAID17M 11   | 3-49  | 1-20 | 3  | 4  | GIDAGTTWN              | 9      | 1-47 | 3  | AAWDDSLSAFM | 11     | -          | -    | N        |
| mAID17M 13   | 1-58  | 3-3  | 2  | 5  | DQADRFVVISRSLRFDV      | 18     | 1-51 | 3  | GTWDSLSARVW | 12     | +          | -    | -        |
| mAID17M 33 # | 3-48  | 5-12 | 1  | 4  | GGGYDAYFDY             | 10     | 1-40 | 3  | QSYDSSLSGSV | 11     |            |      |          |
| mAID17M 38 # | 4-4   | 4-17 | 2  | 6  | LASPYGDPVDDYYYYYGMVDV  | 19     | 2-14 | 2  | SSYTSSSRV   | 9      |            |      |          |

RF, reading frame; #, antibody failed to be expressed

-, non-reactive; +, reactive;

C, diffuse cytoplasmic staining; N, nuclear staining; F, cytoplasmic fibers; V, vesicles

**Supplemental Table 9:** Repertoire and reactivity of antibodies from nmatue naive B cells of AID+/- healy donor 17F

| Ig            | HEAVY  |      |    |    |                          |        | LIGHT |    |             |        |      | REACTIVITY |          |  |
|---------------|--------|------|----|----|--------------------------|--------|-------|----|-------------|--------|------|------------|----------|--|
|               | VH     | D    | RF | JH | CDR3(aa)                 | Length | Vκ    | Jκ | CDR3(aa)    | Length | Poly | Hep2       | Staining |  |
| mAID17F 3     | 5-51   | 2-2  | 2  | 6  | HVIWQGTSSSTRYEDYGMDV     | 20     | 1-39  | 1  | QQSYSTPWT   | 9      | -    | +          | V        |  |
| mAID17F 14    | 4-34   | 6-19 | 2  | 4  | GTGPYSSGWYFDY            | 14     | 1-39  | 2  | QQSYSTPRT   | 9      | -    | -          | -        |  |
| mAID17F 16    | 4-34   | 6-13 | 3  | 4  | GRRAAAAGTPGHFDY          | 15     | 1-5   | 2  | QQYNSYSMYT  | 10     | +    | +          | -        |  |
| mAID17F 29    | 4-61   | 5-12 | 3  | 6  | GSIVAPVGMDV              | 11     | 3-20  | 2  | QQYGSSPRT   | 9      | -    | -          | -        |  |
| mAID17F 40    | 4-34   | 6-13 | 3  | 3  | RGRIAAAGGAFDI            | 13     | 4-1   | 1  | QQYSTRT     | 8      | +    | +          | -        |  |
| mAID17F 101   | 1-18   | 1-1  | 1  | 4  | VQQGPLYCDY               | 11     | 3-20  | 2  | QQYGSSAT    | 8      | -    | -          | -        |  |
| mAID17F 104   | 4-4    | 3-10 | 3  | 4  | EATMVRGVINY              | 11     | 1-16  | 4  | QQYNSYPPT   | 9      | -    | -          | -        |  |
| mAID17F 106   | 3-30   | 6-13 | 2  | 4  | DRVVGGYSSRWYFDY          | 16     | 1-39  | 2  | QQSYSTPRT   | 9      | +    | +          | C        |  |
| mAID17F 107   | 4-39   | 6-19 | 3  | 4  | DCIAVAGTDYFDY            | 13     | 1-39  | 1  | QQSYSTPWT   | 9      | -    | +          | -        |  |
| mAID17F 111   | 3-48   | 1-26 | 3  | 4  | VLLRRGATSLDY             | 12     | 2-28  | 3  | MQALQTPGFT  | 10     | -    | -          | N        |  |
| mAID17F 115   | 1-8    | 3-22 | 3  | 4  | EVVGAPNWFDP              | 11     | 1-39  | 1  | QQSYSTPWT   | 9      | -    | -          | -        |  |
| mAID17F 116   | 3-23   | 6-19 | 2  | 4  | DVSSSGWYPIFDY            | 13     | 3-11  | 5  | QQRSNWPPD   | 9      | -    | -          | -        |  |
| mAID17F 119 # | 3-30   | 3-10 | 1  | 6  | DTLWFGELFLGVLGRHYGMDV    | 22     | 3-11  | 4  | QQRSNWPPLT  | 10     |      |            |          |  |
| mAID17F 124   | 4-39   | 6-13 | 3  | 5  | HSIAAAGTGLHWFPD          | 15     | 1-33  | 1  | QQYDNLPT    | 9      | -    | -          | V        |  |
| mAID17F 6     |        |      |    |    |                          |        | 3-15  | 3  | QQYNNWPFT   | 9      |      |            |          |  |
| mAID17F 109   |        |      |    |    |                          |        | 1-39  | 4  | QQSYSTPLT   | 9      |      |            |          |  |
| mAID17F 114   |        |      |    |    |                          |        | 1-33  | 4  | QQYDNLPLT   | 9      |      |            |          |  |
|               | VH     | D    | RF | JH | CDR3(aa)                 | Length | Vλ    | Jλ | CDR3(aa)    | Length | Poly | Hep2       | Staining |  |
| mAID17F 9     | 4-59   | 6-13 | 2  | 5  | SSRGGGYWFDP              | 11     | 1-44  | 3  | AAWDDSLNGLV | 11     | -    | -          | -        |  |
| mAID17F 18    | 3-21   | 1-14 | 3  | 4  | GHGTPDY                  | 7      | 2-14  | 2  | SSYTSSSTLV  | 10     | -    | -          | -        |  |
| mAID17F 19    | 4-34   | 3-22 | 2  | 4  | RNYYSRGLRY               | 11     | 2-18  | 2  | SSYTSSSTV   | 9      | -    | +          | -        |  |
| mAID17F 46    | 3-23   | 6-13 | 3  | 6  | SAAAGPYYYGMDV            | 14     | 1-44  | 2  | AAWDDSLNGVV | 11     | -    | -          | -        |  |
| mAID17F 47    | 3-23   | 1-20 | 2  | 5  | EGGGWNWDSWFPD            | 14     | 1-44  | 1  | AAWDDSLNGYV | 11     | -    | -          | -        |  |
| mAID17F 106   |        |      |    |    | see kappa                |        | 1-44  | 3  | AAWDDSLNGVV | 11     | -    | -          | -        |  |
| mAID17F 119   |        |      |    |    | see kappa                |        | 2-23  | 3  | CSYAGSSNVV  | 10     | +    | +          | -        |  |
| mAID17F 10    |        |      |    |    |                          |        | 2-8   | 1  | SSYAGSNNLV  | 10     |      |            |          |  |
|               | VH     | D    | RF | JH | CDR3(aa)                 | Length |       |    |             |        |      |            |          |  |
| mAID17F 22    | 3-23   | 3-22 | 2  | 4  | DLLRLRYDSSPFYD           | 14     |       |    |             |        |      |            |          |  |
| mAID17F 37    | 7-4    | 4-17 | 2  | 6  | DLTTLVSDYYYGMDV          | 16     |       |    |             |        |      |            |          |  |
| mAID17F 36    | 3-23   | 3-9  | 2  | 4  | YYDVTNFDY                | 9      |       |    |             |        |      |            |          |  |
| mAID17F 102   | 3-30-3 | 3-22 | 2  | 4  | DQDPLYYYDSSGYRTGGLFDY    | 22     |       |    |             |        |      |            |          |  |
| mAID17F 103   | 4-30-4 | 4-17 | 2  | 6  | ALYGDYSFYAWRSGGGYYYYGMDV | 25     |       |    |             |        |      |            |          |  |
| mAID17F 113   | 1-18   | 3-22 | 2  | 4  | TAPLQYYYDSSGYYPVNYFDY    | 23     |       |    |             |        |      |            |          |  |
| mAID17F 122   | 1-46   | 4-17 | 3  | 4  | DMAVTDLDY                | 9      |       |    |             |        |      |            |          |  |

RF, reading frame; #, antibody failed to be expressed

-, non-reactive; +, reactive;

C, diffuse cytoplasmic staining; N, nuclear staining; F, cytoplasmic fibers; V, vesicles

**Supplemental Table 10:** Repertoire and reactivity of antibodies from mature naive B cells of AD-AID patient 12

| Ig          | HEAVY  |      |    |    |                          | LIGHT  |      |    |              |        | REACTIVITY |      |          |
|-------------|--------|------|----|----|--------------------------|--------|------|----|--------------|--------|------------|------|----------|
|             | VH     | D    | RF | JH | CDR3 (aa)                | Length | Vk   | Jk | CDR3 (aa)    | Length | Poly       | Hep2 | Staining |
| mAID12 1    | 3-9    | 2-2  | 2  | 3  | AKDLFPLGYCSSSCYGARAFDI   | 23     | 3-15 | 2  | QQYNNWPPYT   | 10     | -          | +    | -        |
| mAID12 3    | 1-2    | /    | /  | 5  | ARGVSV DARGGWFD P        | 15     | 2-28 | 4  | MQALQTLT     | 8      | -          | +    | -        |
| mAID12 4    | 3-48   | 6-19 | 2  | 4  | ARPYSSGWYYDY             | 12     | 4-1  | 2  | QQYYSTPLYT   | 10     | -          | +    | -        |
| mAID12 13 # | 3-23   | 5-5  | 2  | 4  | AKGGYSYGFVNRPELDY        | 17     | 2-30 | 4  | MQGTHWPLT    | 9      |            |      |          |
| mAID12 18   | 4-30-4 | /    | /  | 4  | ASATSEGTIDY              | 11     | 2-28 | 4  | MQALQTPLT    | 9      | -          | -    | N        |
| mAID12 20   | 4-34   | /    | /  | 5  | ARGPGRGRPPKHWFDP         | 16     | 1-12 | 4  | QQANSFPLT    | 9      | -          | -    | N        |
| mAID12 21   | 3-66   | 1-26 | 2  | 4  | AREPHSGSYSYD             | 12     | 3-15 | 1  | QQYNNWPS     | 8      | -          | -    | -        |
| mAID12 22   | 3-20   | /    | /  | 3  | ARDRMEPYRGNAFDI          | 15     | 1-39 | 1  | QQSYSTPKT    | 9      | -          | -    | -        |
| mAID12 23   | 3-66   | 3-3  | 2  | 4  | ARILAEWESTYNFWSGYSEYFDY  | 24     | 3-20 | 1  | QQYGSSLWT    | 9      | +          | +    | -        |
| mAID12 26 # | 3-33   | 3-10 | 2  | 4  | ARDGSGSSPGFDN            | 13     | 1-9  | 4  | QQLNSYPLT    | 9      |            |      |          |
| mAID12 39   | 3-21   | 2-2  | 2  | 6  | ASSGYCSSTSCYRRLNYYGMDV   | 23     | 1-39 | 1  | QQSYSTPWT    | 9      | +          | +    | C        |
| mAID12 40   | 5-51   | 6-13 | 3  | 6  | ARWGSIAAAGTGYGMDV        | 19     | 3-20 | 1  | QQYGSSLWT    | 9      | -          | +    | -        |
| mAID12 43   | 3-21   | /    | /  | 3  | ARGGVGGAFDI              | 11     | 1-5  | 4  | QQYNSYSPLT   | 10     | -          | -    | -        |
| mAID12 44   | 4-34   | /    | /  | 6  | AREGYDYYGMDV             | 12     | 2-28 | 2  | MQALQTPKT    | 9      | -          | -    | -        |
| mAID12 46   | 1-3    | 2-2  | 1  | 5  | AREGRVTSYQLLKGWFFDP      | 19     | 3-11 | 4  | QQRSNWPPFT   | 10     | -          | +    | -        |
| mAID12 47   | 3-33   | 3-10 | 2  | 6  | ASEESGSTSEGQRYYYMDV      | 20     | 1-39 | 4  | QQSYSTPLT    | 9      | -          | -    | -        |
| mAID12 02   | 1-3    | 3-3  | 1  | 6  | ARGQFLEWVYMDV            | 13     | 1-44 | 2  | AAWDDSLNEGV  | 11     | -          | -    | -        |
| mAID12 05   | 4-59   | 6-19 | 2  | 6  | ARRVRDLSSGWRLAPVRGYYGMDV | 26     | 2-14 | 1  | SSYTSSTLEV   | 11     |            |      |          |
| mAID12 10   | 1-2    | 6-13 | 2  | 5  | ASRDYSSSWYNWFDP          | 15     | 3-21 | 2  | QVWDDSSDHVV  | 11     |            |      |          |
|             | VH     | D    | RF | JH | CDR3 (aa)                | Length | Vk   | Jk | CDR3 (aa)    | Length | Poly       | Hep2 | Staining |
| mAID12 14   | 1-2    | 6-13 | 3  | 6  | ARALSIAAAGAFYGM DV       | 17     | 2-14 | 1  | SSYTSSTYV    | 10     | -          | +    | -        |
| mAID12 17 # | 4-39   | 3-16 | 2  | 4  | ARHGLSYDYVWGSYSFDY       | 19     | 8-61 | 3  | VLYMGSGISV   | 10     |            |      |          |
| mAID12 18   |        |      |    |    | see kappa                |        | 1-44 | 3  | AAWDDSLNGYVW | 12     | -          | -    | -        |
| mAID12 21   |        |      |    |    | see kappa                |        | 2-14 | 2  | SSYTSSTVV    | 10     | -          | +    | -        |
| mAID12 30   | 3-23   | 2-15 | 2  | 4  | AKYSGGSCCYFDY            | 13     | 1-51 | 2  | GTWDDSLSAV   | 11     | -          | +    | -        |
| mAID12 31   | 3-53   | 2-15 | 2  | 6  | ARDPRRYC GSGCSDGMDV      | 20     | 3-25 | 3  | QSADSSGTLVW  | 11     | -          | +    | -        |
| mAID12 34   | 4-39   | 6-6  | 2  | 4  | ARVHSSSPTKYFDY           | 14     | 3-21 | 3  | QVWDDSSDHPGV | 12     | -          | -    | -        |
| mAID12 37   | 3-30   | 1-26 | 2  | 4  | AKDSGSYGGSHFDY           | 15     | 3-25 | 3  | QSADSSGTSVW  | 11     | -          | -    | -        |
| mAID12 38   | 1-8    | 3-3  | 3  | 4  | ARGLLQEAIFGVVITYYFDY     | 20     | 1-44 | 2  | AAWDDSLNGV   | 11     | -          | -    | -        |
| mAID12 39   |        |      |    |    | see kappa                |        | 2-23 | 3  | CSYAGSSTVW   | 10     | +          | +    | C        |
| mAID12 42   | 4-30-2 | 3-22 | 2  | 4  | VRVIDYDSSGYGYFDY         | 18     | 2-23 | 3  | CSYAGSSTVW   | 11     | -          | +    | N        |
| mAID12 44 # |        |      |    |    | see kappa                |        | 4-69 | 3  | QTWGTGSV     | 8      |            |      |          |
| mAID12 46   |        |      |    |    | see kappa                |        | 2-23 | 2  | CSYAGSSTVW   | 11     | +          | +    | -        |
| mAID12 25   |        |      |    |    |                          |        | 1-39 | 1  | QQSYSTPRT    | 9      |            |      |          |
| mAID12 45   |        |      |    |    |                          |        | 3-15 | 1  | QQYNNWPPWT   | 10     |            |      |          |
| mAID12 33   |        |      |    |    |                          |        | 3-1  | 2  | QAWDSSTV     | 9      |            |      |          |
| mAID12 35   |        |      |    |    |                          |        | 1-44 | 2  | AAWDDSLNGLV  | 11     |            |      |          |
|             | VH     | D    | RF | JH | CDR3 (aa)                | Length |      |    |              |        |            |      |          |
| mAID12 8    | 3-9    | /    | /  | 6  | AKDMEYGPHYGMDV           | 14     |      |    |              |        |            |      |          |
| mAID12 15   | 3-30   | 3-10 | 1  | 4  | AKDPGSELLWGFEDY          | 16     |      |    |              |        |            |      |          |
| mAID12 16   | 1-18   | 1-26 | 1  | 4  | ARGWELPMDY               | 10     |      |    |              |        |            |      |          |
| mAID12 41   | 3-30-3 | 6-19 | 1  | 4  | ARGLLKFP TQWLVS PFDY     | 18     |      |    |              |        |            |      |          |
| mAID12 42   | 4-30-2 | 3-22 | 2  | 4  | VRVIDYDSSGYGYFDY         | 18     |      |    |              |        |            |      |          |

RF, reading frame; #, antibody failed to be expressed

-, non-reactive; +, reactive;

C, diffuse cytoplasmic staining; N, nuclear staining; F, cytoplasmic fibers; V, vesicles



Supplemental Table 11: Repertoire and reactivity of antibodies from mature naive B cells of AD-AID patient 13

| Ig          | HEAVY |      |    |    |                        |        | LIGHT |    |              |        | REACTIVITY |      |          |
|-------------|-------|------|----|----|------------------------|--------|-------|----|--------------|--------|------------|------|----------|
|             | VH    | D    | RF | JH | CDR3 (aa)              | Length | Vk    | Jk | CDR3 (aa)    | Length | Poly       | Hep2 | Staining |
| mAID13 57   | 4-59  | 3-3  | 2  | 6  | GNYDFWSGYYYYYMDV       | 17     | 3-11  | 4  | QQRSNWPTT    | 9      | +          | +    | -        |
| mAID13 63   | 5-51  | 2-2  | 2  | 4  | RRCSSSTSCYDL           | 11     | 1-5   | 1  | QQYQR        | 5      | +          | +    | C        |
| mAID13 67   | 3-48  | 5-5  | 2  | 6  | DQRGYSYGYPFPPRSVGYGMDV | 23     | 1-39  | 5  | QQSYSTPT     | 8      | +          | +    | C        |
| mAID13 68   | 4-34  | 6-13 | 3  | 6  | RKGIAAATRYYYYYGMDV     | 19     | 4-1   | 4  | QQYYSTPFT    | 9      | +          | +    | C        |
| mAID13 69 # | 5-51  | 3-9  | 2  | 4  | EGEDILTGYKPFDY         | 14     | 1-39  | 1  | QQSYSTLWT    | 9      |            |      |          |
| mAID13 70   | 3-30  | 3-10 | 1  | 1  | DSGEWGSWYGYKGFQH       | 16     | 4-1   | 4  | QQYYSTPPLT   | 10     | +          | +    | -        |
|             |       | 6-13 | 2  |    |                        |        |       |    |              |        |            |      |          |
| mAID13 72   | 3-48  | 2-2  | 3  | 4  | IVVPAAMPSTYFDY         | 14     | 2-28  | 3  | MQUALQTRGEFT | 11     | -          | -    | -        |
| mAID13 74   | 3-21  | 1-26 | 2  | 4  | DGGDSGSYTTFDY          | 13     | 1-6   | 1  | LQDYNYPRT    | 9      | -          | -    | -        |
| mAID13 77   | 1-69  | 6-13 | 3  | 1  | LVAAGTGYFQH            | 12     | 3-20  | 5  | QQYGSSPPIT   | 10     | +          | +    | -        |
| mAID13 78   | 1-69  | /    | /  | 6  | ARRFAGVQYYYYGMDV       | 16     | 1-33  | 4  | QQYDNLPPA    | 9      | +          | +    | -        |
| mAID13 79   | 3-21  | 5-12 | 2  | 4  | DGRFGYSGYDPPFDY        | 14     | 1-39  | 1  | QQSYSTPRT    | 9      | -          | -    | -        |
| mAID13 82   | 1-8   | 6-19 | 2  | 3  | QGFSGWYGNAFDI          | 14     | 1-8   | 1  | QQYYSTPWT    | 9      | -          | -    | -        |
| mAID13 84   | 4-34  | 3-3  | 2  | 5  | WTVSTYYDFWSSGYYPYNWFD  | 21     | 3-11  | 4  | QQRSNWPLT    | 9      | -          | -    | -        |
| mAID13 87   | 1-24  | 5-12 | 3  | 3  | QPVGWDIVATIGAFDI       | 16     | 1-39  | 4  | QQSYSTPYT    | 9      | -          | -    | -        |
| mAID13 91 # | 1-2   | 6-13 | 2  | 5  | GISSWYDWFDP            | 12     | 1-39  | 4  | QQSYSTYT     | 8      |            |      |          |
| mAID13 92   | 5-51  | 6-13 | 2  | 4  | QAGYSSWYDPY            | 12     | 4-1   | 4  | QQYYSTPLT    | 9      | -          | -    | -        |
| mAID13 94   | 5-a   | 3-22 | 2  | 4  | LAEYDSSGHSG            | 12     | 1-39  | 4  | QQSYSTPLT    | 9      |            |      |          |
| mAID13 95   | 1-69  | 3-22 | 2  | 3  | DRDSIKDGGAFDI          | 13     | 1-5   | 2  | QQYNSYST     | 8      |            |      |          |
|             | VH    | D    | RF | JH | CDR3 (aa)              | Length | Vl    | Jl | CDR3 (aa)    | d      | Poly       | Hep2 | Staining |
| mAID13 55   | 3-15  | 3-10 | 2  | 6  | YGSGSYYYYYGMV          | 17     | 1-40  | 3  | QSYDSSLGSKV  | 12     | -          | -    | -        |
| mAID13 56   | 3-11  | 2-2  | 2  | 6  | VDCSSTSCYDYYYYMDV      | 18     | 1-40  | 2  | QSYDSSLVSV   | 10     | -          | -    | -        |
| mAID13 58 # | 3-64  | 3-22 | 2  | 4  | TLYYDSSGYYY            | 12     | 2-23  | 3  | CSYAGSSTWV   | 10     |            |      |          |
| mAID13 61 # | 4-34  | 6-19 | 2  | 1  | SGWYAYFQH              | 9      | 1-44  | 3  | AAWDDSLNGWV  | 11     |            |      |          |
| mAID13 62   | 3-74  | 1-26 | 2  | 4  | DSGSYYDY               | 8      | 3-1   | 1  | QAWDSSLVY    | 9      | -          | -    | -        |
| mAID13 73 # | 3-33  | 3-3  | 1  | 4  | GSGRLRFLEWLSGGFDY      | 17     | 7-43  | 3  | LLYYGGANWV   | 10     |            |      |          |
| mAID13 77 # |       |      |    |    | see kappa              |        | 2-8   | 1  | SSYAGSNNPYV  | 11     |            |      |          |
| mAID13 81 # | 1-2   | 3-16 | 1  | 4  | EGEQNQPLLDY            | 11     | 3-1   | 3  | QAWDSSTWV    | 9      |            |      |          |
| mAID13 83 # | 3-7   | 3-3  | 2  | 4  | VTYDFWWSGYYFDY         | 15     | 2-14  | 3  | SSYTSSTWV    | 10     |            |      |          |
| mAID13 85   | 3-30  | 6-19 | 2  | 4  | DFSSGWYAGIDY           | 12     | 2-23  | 3  | CSYAGSSTFWV  | 11     | -          | -    | -        |
| mAID13 86 # | 3-48  | 6-19 | 2  | 4  | GIGGGWGGYFDY           | 12     | 4-69  | 3  | QWGTGQV      | 9      |            |      |          |
| mAID13 88 # | 3-7   | 2-2  | 3  | 3  | ETDVVVPSQLGPDADF       | 18     | 3-1   | 2  | QAWDSSTAV    | 9      |            |      |          |
| mAID13 90   | 4-59  | 3-10 | 2  | 3  | RYYGSGSYRKGAFDI        | 15     | 3-1   | 2  | QAWDSSTV     | 9      | -          | +    | -        |
| mAID13 96   | 1-18  | 6-19 | 3  | 3  | STVAGREDAFDI           | 12     | 1-44  | 2  | AAWDDSLNGWV  | 11     | -          | -    | -        |
| mAID13 93 # |       |      |    |    |                        |        | 2-14  | 3  | SSYTSSTHWV   | 11     |            |      |          |
|             | VH    | D    | RF | JH | CDR3 (aa)              | Length |       |    |              |        |            |      |          |
| mAID13 49   | 3-30  | 5-5  | 2  | 4  | DAGQGYSYWGKTYFDY       | 18     |       |    |              |        |            |      |          |

RF, reading frame; #, antibody failed to be expressed

-, non-reactive; +, reactive;

C, diffuse cytoplasmic staining; N, nuclear staining; F, cytoplasmic fibers; V, vesicles

**Supplemental Table 12:** Repertoire and reactivity of antibodies from mature naive B cells of AD-AID patient 14

| Ig          | HEAVY |      |    |    |                         | LIGHT  |      |    |              |        | REACTIVITY |      |          |
|-------------|-------|------|----|----|-------------------------|--------|------|----|--------------|--------|------------|------|----------|
|             | VH    | D    | RF | JH | CDR3 (aa)               | Length | Vκ   | Jκ | CDR3 (aa)    | Length | Poly       | Hep2 | Staining |
| mAID14 49 # | 3-30  | 3-10 | 1  |    | DHVLLWFGIPEQSYYYGMDV    | 21     | 1-39 | 1  | QSYSTPPWT    | 10     |            |      |          |
| mAID14 52   | 3-66  | /    |    | 4  | GGY                     | 3      | 2-28 | 2  | MQALQTPHT    | 9      | -          | -    | -        |
| mAID14 59 # | 1-69  | 3-22 | 2  | 4  | RYYDSSGYLN              | 11     | 3-20 | 5  | QYGSSTHT     | 8      |            |      |          |
| mAID14 63   | 3-23  | 3-10 | 2  | 4  | PGRYYYGSGSSNPFDY        | 16     | 3-20 | 1  | QYGSSTPRT    | 9      | -          | +    | -        |
| mAID14 67   | 4-61  | 5-5  | 2  | 4  | DKRGYSPRGLEY            | 12     | 4-1  | 1  | QYYSTPWT     | 9      | +          | +    | -        |
| mAID14 71 # | 1-69  | 3-10 | 3  | 6  | VDITMVRGVKGGRDGRYYYGMDV | 24     | 1-9  | 4  | QQLNSYPLT    | 9      |            |      |          |
| mAID14 75 # | 3-11  | 3-16 | 1  | 4  | LGGSKYYFDY              | 10     | 1-5  | 1  | QYNSYPWT     | 9      |            |      |          |
| mAID14 81   | 5-51  | 6-13 | 2  | 3  | LALSAPYSSWYDAFDI        | 17     | 3-11 | 1  | QQRSNWPPT    | 9      | -          | +    | -        |
| mAID14 82   | 3-23  | 3-10 | 1  | 5  | DPSKLLWFEGEPYNWFDP      | 18     | 2-28 | 4  | MQALQTPHT    | 9      | -          | -    | -        |
| mAID14 83 # | 1-18  | 3-22 | 2  | 3  | ESPTYDSSGSYAFDI         | 17     | 2-30 | 2  | MQGTHWPRT    | 9      |            |      |          |
| mAID14 86   | 3-7   | 3-10 | 1  | 4  | DWSWFGELFDY             | 11     | 1-39 | 2  | QSYSTPPNT    | 10     | +          | -    | -        |
| mAID14 87 # | 4-34  | 3-9  | 2  | 5  | VTGILTGNWVDFP           | 14     | 2-28 | 1  | MQALQTPWT    | 9      |            |      |          |
| mAID14 88   | 3-15  | 4-17 | 2  | 6  | LYGDYVGRHYGMDV          | 15     | 4-1  | 2  | QYYSTPYT     | 9      | +          | +    | -        |
| mAID14 89 # | 1-3   | 6-13 | 3  | 4  | KSTSLPGIAAAGPNYFDY      | 18     | 3-15 | 2  | QYNNWPPYT    | 10     |            |      |          |
| mAID14 93   | 4-61  | /    |    | 6  | DLRTGMDV                | 8      | 1-33 | 2  | QYDNLPT      | 9      | -          | -    | -        |
| mAID14 95   | 3-23  | 6-19 | 2  | 4  | GPAYSSGWGMDYFDY         | 15     | 3-20 | 4  | QYGSSTPPLT   | 11     | -          | -    | -        |
|             | VH    | D    | RF | JH | CDR3 (aa)               | Length | Vλ   | Jλ | CDR3 (aa)    | Length | Poly       | Hep2 | Staining |
| mAID 56     | 3-30  | /    |    | 6  | ILYLGfVHYYYGMDV         | 15     | 1-51 | 2  | GTWDSLSAGVV  | 11     | +          | +    | -        |
| mAID 58     | 1-69  | 4-17 | 2  | 4  | ASDYGdYDVPVFDY          | 14     | 2-14 | 2  | SSYTSSTLV    | 10     | +          | -    | -        |
| mAID 59 #   | 1-69  | 3-22 | 2  | 4  | see kappa               | 11     | 1-44 | 3  | AAWDDSLNGPWW | 12     |            |      |          |
| mAID 60     | 7-4-1 | 2-2  | 2  | 4  | DSGYCSSTSCHFDY          | 14     | 1-44 | 2  | AAWDDSLNLVV  | 11     | -          | -    | -        |
| mAID 62 #   | 3-30  | 2-15 | 2  | 6  | DGAGGCSGSSCYYYGMDV      | 18     | 1-40 | 2  | QSYDSSLGSDVW | 11     |            |      |          |
| mAID65      | 3-11  | 1-1  | 1  | 5  | DGPQLERPWFDP            | 13     | 1-40 | 2  | QSYDSSLVW    | 10     | -          | -    | -        |
| mAID66      | 4-61  | 3-9  | 1  | 4  | VDGGYFDY                | 8      | 2-14 | 3  | SSYTSSTVW    | 10     | -          | -    | -        |
| mAID75 #    |       |      |    |    | see kappa               |        | 1-40 | 2  | QSYDSSLVW    | 10     |            |      |          |
| mAID78      | 3-49  | 6-19 | 1  | 6  | DRGEQWLIYYYGMDV         | 17     | 2-8  | 2  | SSYAGSNYYVW  | 11     | +          | +    | -        |
| mAID 81 #   |       |      |    |    | see kappa               |        | 1-40 | 2  | QSYDSSLGGSV  | 11     |            |      |          |
| mAID 90 #   | 1-46  | 5-12 | 2  | 6  | DVRDSGYDHYYYGMDV        | 17     | 1-44 | 2  | AAWDDSLNGVV  | 11     |            |      |          |
| mAID 91     | 4-31  | 2-2  | 2  | 4  | AWRYCSSTSCPGYYFDY       | 18     | 2-23 | 2  | CSYAGSSTFAV  | 11     | -          | +    | -        |
| mAID 92     | 3-23  | 2-2  | 3  | 6  | VEVPAAMRVEAHYGMDV       | 17     | 3-25 | 3  | QSADSSGTYVW  | 11     | -          | +    | -        |
|             | VH    | D    | RF | JH | CDR3 (aa)               | Length |      |    |              |        |            |      |          |
| mAID14 57 # | 1-3   | 3-22 | 2  | 6  | SPYYYDSSGYPYYYGMDV      | 19     |      |    |              |        |            |      |          |
| mAID 63 #   | 3-23  | 3-10 | 2  | 4  | PGRYYYGSGSSNPFDY        | 16     |      |    |              |        |            |      |          |
| mAID14 64   | 3-48  | /    |    | 4  | DTTLWRGLFDY             | 11     |      |    |              |        |            |      |          |
| mAID14 69 # | 3-21  | 3-9  | 2  | 6  | DGLNYDILTGSVGGMDV       | 17     |      |    |              |        |            |      |          |
| mAID 73 #   | 1-46  | 2-15 | 3  | 5  | DLVQVVVAATYWFDP         | 15     |      |    |              |        |            |      |          |
| mAID14 80 # | 3-49  | 6-19 | 1  | 6  | DRGEQWLIYYYGMDV         | 16     |      |    |              |        |            |      |          |
| mAID14 84 # | 3-33  | 2-15 | 2  | 6  | LMDCSGGSCYYGMDV         | 15     |      |    |              |        |            |      |          |

RF, reading frame; #, antibody failed to be expressed

-, non-reactive; +, reactive;

C, diffuse cytoplasmic staining; N, nuclear staining; F, cytoplasmic fibers; V, vesicles

**Supplemental Table 13:** Repertoire and reactivity of antibodies from mature naive B cells of AD-AID patients

| Ig          | HEAVY  |      |    |    |                       | LIGHT  |      |    |              |        | REACTIVITY |      |          |
|-------------|--------|------|----|----|-----------------------|--------|------|----|--------------|--------|------------|------|----------|
|             | VH     | D    | RF | JH | CDR3 (aa)             | Length | Vκ   | Jκ | CDR3 (aa)    | Length | Poly       | Hep2 | Staining |
| mAID18 7 #  | 3-30-3 | 5-5  | 2  | 6  | DQRYSYAITNYYYGMDV     | 18     | 2-28 | 3  | MQALQTLFT    | 9      |            |      |          |
| mAID18 16   | 3-48   | 6-19 | 2  | 5  | DYSSGWYDNWFDP         | 13     | 1-39 | 1  | QQSYSTPWT    | 9      | -          | -    | -        |
| mAID18 33   | 3-30-3 | 2-21 | 2  | 4  | DCGGDCYGGLDY          | 12     | 3-11 | 2  | QQRSNWPPYT   | 10     | -          | -    | -        |
| mAID18 36 # | 1-69   | 5-12 | 3  | 6  | EGIVAKRASNYGMDV       | 16     | 3-20 | 1  | QQYGSSPRT    | 9      |            |      |          |
| mAID18 43   | 4-31   | 2-22 | 3  | 1  | FGTAVVGEH             | 9      | 3-11 | 1  | QQRSNWPGT    | 9      | -          | -    | -        |
| mAID18 47   | 3-73   | 3-22 | 2  | 3  | RTPWAKYYDSSGYNFDAFDI  | 22     | 2-28 | 4  | MQALQTLPT    | 9      | +          | +    | -        |
| mAID18 49   | 4-34   | 3-10 | 3  | 5  | GTYYYGSGSFQRGHWFDP    | 18     | 1-39 | 2  | QQSYSTPRGT   | 10     | -          | -    | -        |
| mAID18 53 # | 4-31   | 3-3  | 1  | 5  | WQGADVLRFLWSSYNWFDP   | 20     | 1-39 | 4  | QQSYSTPLT    | 9      |            |      |          |
| mAID18 54   | 1-2    | 5-5  | 3  | 4  | GSGAMVTGKFDY          | 12     | 1-9  | 1  | QQLNSYPWT    | 9      | -          | +    | -        |
| mAID18 65   | 1-69   | 3-3  | 2  | 4  | TIFGVVIEYFDY          | 13     | 1-5  | 3  | QQYNSYSPFT   | 10     | +          | -    | -        |
| mAID18 69 # | 3-21   | /    | /  | 4  | EMGYPGYFDY            | 10     | 1-39 | 1  | QQSYSTPRT    | 9      |            |      |          |
| mAID18 72   | 1-2    | 3-22 | 2  | 4  | DLGDSSGYGLVAWGDLDY    | 20     | 1-27 | 1  | QKYNALWT     | 9      | -          | -    | -        |
| mAID18 73   | 4-39   | 5-5  | 3  | 4  | DLNTAMAPTPYFDY        | 14     | 1-12 | 4  | QQANSFPLT    | 9      | -          | -    | -        |
| mAID18 76   | 4-31   | 1-26 | 2  | 4  | DISSSGSYGLFADFADI     | 17     | 1-39 | 3  | QQSYSTPPTT   | 10     | +          | +    | C        |
| mAID18 78   | 3-30-3 | 5-24 | 3  | 4  | DRMATIESFDY           | 11     | 1-12 | 4  | QQANSFPLT    | 9      | -          | -    | -        |
| mAID18 79   | 4-34   | 2-21 | 2  | 4  | GKVVITARWSRRGDVGYFDY  | 19     | 3-15 | 3  | QQYNNWPSFT   | 10     | +          | +    | N        |
| mAID18 86   | 4-34   | 4-23 | 2  | 4  | GRPDDYGGNPFDY         | 14     | 4-1  | 1  | QQYYSTPST    | 9      | -          | -    | -        |
| mAID18 57   |        |      |    |    |                       |        | 1-39 | 1  | QQSYSTPRT    | 9      |            |      |          |
| mAID18 62   |        |      |    |    |                       |        | 1-39 | 4  | QQSYSTPLT    | 9      |            |      |          |
|             | VH     | D    | RF | JH | CDR3 (aa)             | Length | Vλ   | Jλ | CDR3 (aa)    | Length | Poly       | Hep2 | Staining |
| mAID18 2    | 4-59   | 5-5  | 2  | 5  | DKGGYSYGYENWFDP       | 15     | 5-45 | 3  | MIWHSSAWV    | 9      | -          | -    | N        |
| mAID18 3    | 3-15   | 5-5  | 2  | 4  | MFGYSYGYSYFDY         | 13     | 1-40 | 2  | QSYDSSLGSGV  | 11     | -          | -    | -        |
| mAID18 11   | 4-34   | 2-2  | 3  | 4  | GGASAQDIVVPAAIKGRYFDY | 23     | 1-51 | 3  | GTWDSLSVWV   | 11     | -          | -    | -        |
| mAID18 13   | 1-69   | 3-10 | 3  | 6  | DRKGGFTMVRGVLRYGMDV   | 20     | 1-40 | 2  | QSYDSSLGSGV  | 11     | +          | +    | C        |
| mAID18 19   | 3-21   | 5-5  | 1  | 4  | AWIQLWHPFDY           | 11     | 3-21 | 2  | QVWDSSTDHPV  | 11     | -          | -    | -        |
| mAID18 23   | 4-34   | /    | /  | 6  | GVNYYGMDV             |        | 1-51 | 2  | GTWDSLSAVV   | 11     | -          | +    | -        |
| mAID18 24   | 3-9    | 3-10 | 3  | 6  | DMGEGITMVRGVTDDYYGMDV | 22     | 1-36 | 3  | AAWDDSLNGWV  | 11     | -          | -    | -        |
| mAID18 25   | 4-59   | 1-26 | 2  | 4  | AMAGEKWEQGWGFDY       | 15     | 1-44 | 1  | AAWDDSLNGYV  | 11     | -          | -    | -        |
| mAID18 49   |        |      |    |    | see kappa             |        | 3-21 | 1  | QVDSSTDHPGV  | 11     | -          | -    | -        |
| mAID18 50   | 3-11   | /    | /  | 4  | VQEPWGGLDY            | 10     | 1-47 | 3  | AAWDDSLSGPGV | 12     | -          | -    | -        |
| mAID18 53   |        |      |    |    | see kappa             |        | 2-11 | 3  | CSYAGSYTPV   | 10     | +          | +    | -        |
| mAID18 56   | 3-30-3 | 3-3  | 2  | 6  | SSYDFWSGYPYYYGMDV     | 19     | 7-46 | 3  | LLYSGAYWV    | 10     | +          | -    | -        |
| mAID18 68   | 1-69   | 2-2  | 3  | 3  | EGVGT RPRAARKAFDI     | 16     | 1-40 | 1  | QSYDSSLGSGYV | 11     | -          | -    | -        |
| mAID18 75   | 1-2    | 6-6  | 3  | 6  | DSAAPT KGGYYYYGMDV    | 17     | 2-8  | 3  | SSYAGSNNWV   | 10     | -          | +    | N        |
| mAID18 95 # | 3-7    | 3-10 | 3  | 6  | GVIVAVYYYYGMDV        | 14     | 7-46 | 2  | LLYSGARPGV   | 11     |            |      |          |
| mAID18 85   |        |      |    |    |                       |        | 1-47 | 2  | AAWDDSLSGVW  | 11     |            |      |          |
|             | VH     | D    | RF | JH | CDR3 (aa)             | Length |      |    |              |        |            |      |          |
| mAID18 42   | 3-23   | 3-22 | 2  | 5  | NAWSWSYYYDSSGYG       | 16     |      |    |              |        |            |      |          |
| mAID18 91   | 1-46   | /    | /  | 5  | GSNWFPD               | 7      |      |    |              |        |            |      |          |
| mAID18 5    | 1-69   | 3-16 | 2  | 4  | VAPYYDYVWGCDFY        | 14     |      |    |              |        |            |      |          |
| mAID18 90   | 4-34   | 4-17 | 2  | 4  | VEKGGTYGDYVSGLYYFDY   | 19     |      |    |              |        |            |      |          |

RF, reading frame; #, antibody failed to be expressed

-, non-reactive; +, reactive;

C, diffuse cytoplasmic staining; N, nuclear staining; F, cytoplasmic fibers; V, vesicles

**Supplemental Table 14:** Repertoire and reactivity of antibodies from mature naive B cells of UNG-deficient patient 1.

| Ig        | HEAVY |      |    |    | CDR3 (aa)          | Length | LIGHT |    |             | CDR3 (aa) | Length | REACTIVITY |          |  |
|-----------|-------|------|----|----|--------------------|--------|-------|----|-------------|-----------|--------|------------|----------|--|
|           | VH    | D    | RF | JH |                    |        | Vk    | Jk | Poly        |           |        | Hep2       | Staining |  |
| mUNG1 06  | 3-13  | 6-6  | 3  | 3  | ARAGIAALRDAFDI     | 14     | 3-20  | 1  | QQHGSSPWWT  | 9         | -      | -          | -        |  |
| mUNG1 07  | 1-58  | 4-17 | 3  | 5  | AASTHTVTTLGWDFP    | 15     | 3-11  | 2  | QQRSNWPPKYT | 11        | -      | +          | -        |  |
| mUNG1 12  | 3-9   | 2-15 | 2  | 1  | GGGDGGGSFPLQH      | 13     | 1-13  | 3  | QQFNSYPFT   | 9         | -      | -          | -        |  |
| mUNG1 13  | 3-9   | 3-3  | 2  | 3  | AKRGRVFWSSYMDALDI  | 16     | 1-39  | 1  | QQSYSSPPT   | 9         | -      | +          | F        |  |
| mUNG1 17  | 4-39  | /    | /  | 6  | ASYPESYYGMDV       | 13     | 3-20  | 3  | QQYGSSPGGFT | 11        | -      | -          | -        |  |
| mUNG1 29  | 4-59  | 3-22 | 2  | 4  | ARGTYYYDSSGYSPYFDY | 20     | 1-39  | 1  | QQSYSTPPT   | 9         | -      | -          | -        |  |
| mUNG1 35  | 1-2   | 2-2  | 2  | 4  | ARGPYCSSTSCPGAIFY  | 17     | 1-13  | 4  | QQFNSYPLT   | 9         | -      | -          | -        |  |
| mUNG1 41  | 3-23  | /    | /  | 4  | AKTPPEPFYD         | 10     | 2-30  | 3  | MQGTHWPPFT  | 10        | -      | -          | -        |  |
| mUNG1 59  | 1-8   | 4-17 | 2  | 4  | ARGSYGDYFDY        | 11     | 1-5   | 1  | QQYNSYPWT   | 9         | -      | -          | -        |  |
| mUNG1 70  | 4-31  | 2-15 | 2  | 5  | ARDGCSGGSCYPRPNWF  | 19     | 4-1   | 4  | QQYYSIPPV   | 9         | -      | -          | -        |  |
| mUNG1 106 | 3-48  | 3-16 | 2  | 6  | ARESDYVWGINYGMDV   | 16     | 1-39  | 2  | QQSYSTPYT   | 9         | -      | -          | -        |  |
| mUNG1 113 | 1-8   | 2-15 | 3  | 6  | ARGRVVAAIPLMDV     | 15     | 3-20  | 1  | QQYNSPT     | 8         | -      | -          | -        |  |
| mUNG1 118 | 1-69  | 6-19 | 2  | 4  | ARVGAGYSSGGDY      | 14     | 1-5   | 1  | QQYNSYHT    | 8         | +      | +          | C        |  |
| mUNG1 120 | 3-23  | 4-17 | 2  | 4  | AKPPDYGLD          | 10     | 1-5   | 2  | QQYNSYSCS   | 9         | -      | -          | -        |  |
| mUNG1 153 | 3-23  | 3-22 | 2  | 4  | AKSGGYDSSGYRYFDY   | 18     | 1-33  | 5  | QQYDNLPIIT  | 9         | -      | -          | -        |  |
| mUNG1 183 | 3-48  | 1-26 | 2  | 4  | ARDTYSGIRGFFDY     | 14     | 1-12  | 2  | QQANSFPMYT  | 10        | -      | +          | -        |  |
| mUNG1 190 | 4-28  | /    | /  | 6  | ARDHGMDV           | 8      | 1D-17 | 4  | LQHNSYPLT   | 9         | -      | -          | -        |  |
|           | VH    | D    | RF | JH | CDR3 (aa)          | Length | Vλ    | Jλ | CDR3 (aa)   | Length    | Poly   | Hep2       | Staining |  |
| mUNG1 13  |       |      |    |    | see kappa          |        | 3-19  | 1  | NSRDSSGNHYV | 11        | -      | -          | -        |  |
| mUNG1 28  | 3-33  | /    | /  | 6  | ARDRWPPYGMDV       | 12     | 3-1   | 1  | QAWDSSTCYV  | 11        | -      | -          | -        |  |
|           | VH    | D    | RF | JH | CDR3 (aa)          | Length |       |    |             |           |        |            |          |  |
| mUNG1 14  | 1-46  | 3-3  | 3  | 6  | ARDQGPFTIFGYGMDV   | 17     |       |    |             |           |        |            |          |  |
| mUNG1 22  | 4-31  | /    | /  | 4  | ARGPFGHFDY         | 10     |       |    |             |           |        |            |          |  |
| mUNG1 43  | 3-33  | 7-27 | 3  | 4  | AREGTGSLDY         | 10     |       |    |             |           |        |            |          |  |
| mUNG1 44  | 3-7   | 6-19 | 3  | 4  | ARERIIAVAGFPVYFDY  | 17     |       |    |             |           |        |            |          |  |
| mUNG1 45  | 3-15  | 3-10 | 1  | 4  | TTDVPSREFYFDY      | 14     |       |    |             |           |        |            |          |  |
| mUNG1 47  | 3-15  | 3-3  | 3  | 5  | ARDEGITIFGVVS      | 13     |       |    |             |           |        |            |          |  |
| mUNG1 79  | 3-48  | 3-22 | 2  | 3  | ARDSIFDSSGYHDAFDI  | 17     |       |    |             |           |        |            |          |  |
| mUNG1 101 | 3-33  | 3-22 | 2  | 4  | ARDGHYYDSSGYSPFDY  | 17     |       |    |             |           |        |            |          |  |
| mUNG1 138 | 4-59  | /    | /  | 4  | ARHVTLKGGGRYFDY    | 15     |       |    |             |           |        |            |          |  |
| mUNG1 149 | 1-8   | 6-25 | 2  | 4  | ASGYAWDY           | 9      |       |    |             |           |        |            |          |  |
| mUNG1 162 | 4-28  | 3-3  | 2  | 4  | GGERRGNDFWSGQDY    | 15     |       |    |             |           |        |            |          |  |
| mUNG1 165 | 3-23  |      |    | 4  | AGRDGY             | 6      |       |    |             |           |        |            |          |  |

RF, reading frame; #, antibody failed to be expressed

-, non-reactive; +, reactive;

C, diffuse cytoplasmic staining; N, nuclear staining; F, cytoplasmic fibers; V, vesicles

**Supplemental Table 15:** Repertoire and reactivity of antibodies from new emigrant B cells of UNG-deficient patient 2.

| Ig         | HEAVY |      |    |    |                        | LIGHT  |      |    |              |        | REACTIVITY |      |          |
|------------|-------|------|----|----|------------------------|--------|------|----|--------------|--------|------------|------|----------|
|            | VH    | D    | RF | JH | CDR3 (aa)              | Length | Vκ   | Jκ | CDR3 (aa)    | Length | Poly       | Hep2 | Staining |
| mUNG2 1    | 3-21  | 3-22 | 2  | 6  | HYDSSGQEKNYYYYGMDV     | 18     | 2-28 | 2  | MQALQTPNT    | 9      | -          | -    | -        |
| mUNG2 2    | 5-51  | 6-13 | 2  | 4  | HDGSSSWPFDDY           | 11     | 1-27 | 1  | QKYNAPWT     | 9      | -          | -    | -        |
| mUNG2 3    | 3-73  | 3-10 | 3  | 4  | RITMVRGVEIHDY          | 13     | 2-28 | 5  | MQALQTLIT    | 9      | -          | +    | -        |
| mUNG2 4    | 3-53  | 3-10 | 1  | /  | DHAGILWFG              | 9      | 1-33 | 2  | QQYDNLPLYT   | 9      | -          | -    | -        |
| mUNG2 5    | 4-39  | 2-2  | 3  | 4  | TLPAAAIPNSFDY          | 13     | 1-27 | 1  | QNPRT        | 5      | -          | -    | -        |
| mUNG2 7 #  | 3-30  | 6-13 | 1  | 5  | GRQQLVGNWFDP           | 12     | 1-5  | 5  | QQYNSYPIT    | 9      |            |      |          |
| mUNG2 9 #  | 1-18  | /    | /  | 6  | DKDWSPVIVDYYGMDV       | 17     | 2-29 | 1  | MQGIHLPTWT   | 11     |            |      |          |
| mUNG2 10 # | 3-49  | 3-9  | 1? | 6  | ARLRYFDWLLDFGMDV       | 16     | 2-28 | 4  | MQALQTPIT    | 9      |            |      |          |
| mUNG2 12   | 3-30  | 3-22 | 2  | 4  | GKYYYYDSSGYHY          | 13     | 1-39 | 5  | QQSYSTPFT    | 9      | -          | -    | -        |
| mUNG2 13 # | 1-24  | /    | /  | 4  | DFSHTS                 | 7      | 3-15 | 4  | QQYNNWPPLT   | 10     |            |      |          |
| mUNG2 15 # | 4-31  | /    | /  | 5  | DVAVRRGWFPD            | 11     | 1-39 | 2  | QQSYSTLYT    | 9      |            |      |          |
| mUNG2 18 # | 3-11  | 3-10 | 1  | 6  | DRPRNVLLWFGELLDYYGMDV  | 22     | 1-33 | 5  | QQYDNLPT     | 9      |            |      |          |
| mUNG2 21   | 3-30  | 2-2  | 2  | 6  | APPGYCSSTSCYPVYYYYGMDV | 23     | 1-16 | 4  | QQYNSYPPT    | 9      | +          | +    | N        |
| mUNG2 24   | 3-30  | 5-12 | 3  | 3  | GLGVVATIWIWGARGHDAFDI  | 21     | 1-33 | 2  | QQYDNLPT     | 9      | +          | +    | C        |
|            |       | 3-16 | 2  |    |                        |        |      |    |              |        |            |      |          |
| mUNG2 26   | 3-23  | 3-22 | 2  | 4  | LIFWRAGSSGYLRETFDY     | 18     | 1-33 | 4  | QQYDNLPLT    | 9      | -          | -    | -        |
| mUNG2 27   | 3-23  | 3-10 | 2  | 6  | FGSGSYYYYYGMDV         | 14     | 1-39 | 4  | QQSYSTPPLT   | 10     | +          | +    | C        |
| mUNG2 28   | 3-9   | 2-2  | 1  | 4  | ANLYQLRWYFDY           | 13     | 1-39 | 2  | QQSYSTPNT    | 9      | -          | -    | -        |
| mUNG2 34   | 3-48  | 2-15 | 3  | 6  | GNPDIVVVAATLHYGMDV     | 21     | 2-30 | 1  | MQGTHWPPWT   | 10     | -          | -    | -        |
| mUNG2 36   | 4-59  | 6-13 | 2  | 5  | TLGYSSSWYWFDP          | 14     | 1-39 | 5  | QQSYSTLIT    | 9      | -          | +    | C        |
| mUNG2 39   | 3-21  | 2-15 | 2  | 6  | DQGCSSGSCRIGYYGMDV     | 19     | 3-11 | 4  | QQRSNWPRLLT  | 11     | -          | -    | -        |
| mUNG2 46 # | 3-30  | /    | /  | 3  | PHDYRAFDI              | 9      | 3-20 | 1  | QQYGSSPWT    | 9      |            |      |          |
| mUNG2 47 # | 3-49  | 3-10 | 3  | 5  | DGAPFMVRGVIGWFDP       | 16     | 1-39 | 3  | QQSYSTFIT    | 9      |            |      |          |
| mUNG2 48 # | 3-9   | 3-10 | 2  | 6  | DRGYYGSGSYTHYYYYGMDV   | 23     | 3-20 | 1  | QQYGSSWT     | 8      |            |      |          |
| mUNG2 8    |       |      |    |    |                        |        | 1-5  | 2  | QQYNSY       | 6      |            |      |          |
|            | VH    | D    | RF | JH | CDR3 (aa)              | Length | Vλ   | Jλ | CDR3 (aa)    | Length | Poly       | Hep2 | Staining |
| mUNG2 13 # |       |      |    |    | see kappa              |        | 6-57 | 2  | QSYDSSNVV    | 9      |            |      |          |
| mUNG2 20   | 3-30  | 3-22 | 2  | 6  | ARYYYDSSGYPGYYYYGMDV   | 21     | 6-57 | 2  | QSYDSSNQNVV  | 11     | -          | -    | -        |
| mUNG2 28   |       |      |    |    | see kappa              |        | 1-51 | 2  | GTWDSSLSAVV  | 11     | -          | -    | -        |
| mUNG2 29   | 3-21  | 3-10 | 1  | 6  | GLLWFGEPSTYYYGMDV      | 17     | 1-40 | 2  | QSYDSSLSAVV  | 11     | -          | -    | -        |
| mUNG2 30   | 4-59  | 3-10 | 2  | 6  | GISGSGIGEALLYYYGMDV    | 20     | 3-1  | 2  | QAWDSSIHVV   | 10     | -          | -    | -        |
| mUNG2 32   | 1-69  | 4-17 | 2  | 4  | EAGDNGFDY              | 9      | 2-14 | 1  | SSYTSSTYV    | 10     | -          | -    | -        |
| mUNG2 33   | 1-69  | 5-12 | 2  | 4  | DQWGAERGYSGYETD        | 15     | 1-47 | 2  | AAWDDSLSGVV  | 11     | -          | -    | -        |
| mUNG2 40 # | 1-69  | 6-13 | 2  | 4  | VGISSADPSYFYDY         | 15     | 3-21 | 1  | QVWDDSSDLFYV | 12     |            |      |          |
|            | VH    | D    | RF | JH | CDR3 (aa)              | Length |      |    |              |        |            |      |          |
| mUNG2 19   | 4-59  | 3-10 | 2  | 6  | LGGSGSYNPTYYYYYYGMDV   | 22     |      |    |              |        |            |      |          |
| mUNG2 22   | 4-59  | 2-15 | 2  | 6  | AYRPRYCSGGSCYGGGMDV    | 19     |      |    |              |        |            |      |          |
| mUNG2 35   | 4-34  | 6-13 | 2  | 5  | GPGSSWYGPWFDP          | 13     |      |    |              |        |            |      |          |
| mUNG2 37   | 4-39  | 3-10 | 3  | 5  | PYSDISMVRGVITWFDP      | 17     |      |    |              |        |            |      |          |
| mUNG2 42   | 3-49  | 3-22 | 2  | 4  | GPNDRLGSGYVYDGGNEEFDY  | 22     |      |    |              |        |            |      |          |
| mUNG2 44   | 3-30  | 7-27 | 2  | 6  | AKDFWGFPSNYYYGMDV      | 17     |      |    |              |        |            |      |          |

RF, reading frame; #, antibody failed to be expressed

-, non-reactive; +, reactive;

C, diffuse cytoplasmic staining; N, nuclear staining; F, cytoplasmic fibers; V, vesicles

**Supplemental Table 16:** Repertoire and reactivity of antibodies from new emigrant B cells of UNG-deficient patient 5.

| Ig         | HEAVY |      |    |    |     |                       | LIGHT |        |      |    |              |        | REACTIVITY |      |          |  |
|------------|-------|------|----|----|-----|-----------------------|-------|--------|------|----|--------------|--------|------------|------|----------|--|
|            | VH    | D    | RF | JH | (-) | CDR3(aa)              | (+)   | Length | Vκ   | Jκ | CDR3(aa)     | Length | Poly       | Hep2 | Staining |  |
| mUNG5 57   | 4-34  | 3-22 | 2  | 4  | 2   | RYYDSSGYPLQYFDY       | 1     | 15     | 3-15 | 1  | QQYNNWPWT    | 9      | -          | -    | -        |  |
| mUNG5 64   | 4-39  | 6-19 | 1  | 3  | 2   | RLHAQWLVLDAFDI        | 2     | 14     | 2-29 | 4  | MQGIHLPLT    | 9      | -          | -    | -        |  |
| mUNG5 67   | 1-46  | 7-27 | 2  | 4  | 1   | PLNGNYWGYFDY          | 0     | 13     | 1-39 | 3  | QQSYSTPFT    | 9      | -          | -    | -        |  |
| mUNG5 69   | 3-48  | 2-2  | 3  | 6  | 2   | DDFFIVVPAAPLFCGMDV    | 0     | 19     | 3-20 | 4  | QQYGSSPLT    | 9      | -          | +    | -        |  |
| mUNG5 72   | 4-31  | 6-6  | 3  | 4  | 1   | GGAARAYYFDY           | 1     | 12     | 1-5  | 2  | QQYNSYPYT    | 9      | -          | -    | -        |  |
| mUNG5 73   | 1-8   | 2-2  |    | 5  | 1   | NCSSTSCYIRGPAGYWFDP   | 1     | 19     | 3-11 | 4  | QQRSNWPLT    | 9      | -          | -    | -        |  |
| mUNG5 74   | 5-51  | 3-22 | 2  | 4  | 2   | HHYYDSSGYHYDY         | 3     | 13     | 1-39 | 4  | QQSYSTPPH    | 9      | -          | -    | -        |  |
| mUNG5 76   | 1-8   | 3-22 |    | 4  | 2   | GRVHYDDY              | 2     | 8      | 1-9  | 1  | QQLNSYPRT    | 9      | -          | -    | -        |  |
| mUNG5 77   | 3-53  | 3-10 |    | 5  | 1   | SDEV                  | 0     | 4      | 1-39 | 1  | QQSYSTLWT    | 9      | -          | -    | -        |  |
| mUNG5 90   | 1-69  | 3-3  | 2  | 6  | 3   | LNTSGYHREWDYYGMDV     | 2     | 18     | 1-39 | 4  | QQSYSTPLT    | 9      | -          | -    | -        |  |
| mUNG5 92   | 3-30  | 7-27 |    | 3  | 3   | DDHMRHWGGFAFDI        | 3     | 14     | 1-8  | 3  | QQYYSYPFT    | 9      | -          | +    | -        |  |
| mUNG5 93   | 3-49  | 3-22 | 2  | 4  | 3   | EVDSSGYHYQGDY         | 1     | 14     | 4-1  | 5  | QQYYSTPIT    | 9      | -          | -    | -        |  |
| mUNG5 95   | 3-21  | 6-19 | 3  | 6  | 1   | TLPARIAVAGYGMDV       | 1     | 15     | 3-20 | 4  | QQYGSSPP     | 8      | +          | +    | C        |  |
|            | VH    | D    | RF | JH | (-) | CDR3(aa)              | (+)   | Length | Vλ   | Jλ | CDR3(aa)     | Length | Poly       | Hep2 | Staining |  |
| mUNG5 50   | 5-51  | 5-5  | 2  | 6  | 1   | NIGYSYGPPLNYGMDV      | 0     | 16     | 2-11 | 2  | CSYAGSYTVV   | 10     | -          | -    | -        |  |
| mUNG5 59   | 1-18  | 2-21 | 3  | 6  | 3   | GQVTPDEGPLNYYYYYGMVDV | 0     | 21     | 1-47 | 3  | AAWDDSLSGWV  | 11     | -          | -    | -        |  |
| mUNG5 83 # | 3-74  | 6-6  | 2  | 6  | 1   | LSSSSFYYYYYYGMVDV     | 0     | 16     | 1-44 | 2  | AAWDDSLNGPV  | 11     |            |      |          |  |
| mUNG5 85   | 3-23  | 3-3  | 1  | 4  | 4   | EDRLRFLEWLFHGYYFDY    | 3     | 18     | 2-14 | 2  | SSYTSSTVV    | 10     | +          | +    | -        |  |
| mUNG5 87   | 4-34  | 6-19 | 3  | 4  | 2   | ESAVAGTDY             | 0     | 9      | 1-40 | 2  | QSYDSSLSGSKV | 12     | -          | -    | -        |  |
| mUNG5 92   |       |      |    |    |     | see kappa             |       |        | 1-47 | 2  | AAWDDSLSVVV  | 11     | -          | +    | -        |  |

RF, reading frame; #, antibody failed to be expressed

-, non-reactive; +, reactive;

C, diffuse cytoplasmic staining; N, nuclear staining; F, cytoplasmic fibers; V, vesicles
